# Supplementary material for: Ti Group Metallocene-Catalyzed Synthesis of 1-Hexene Dimers and Tetramers
Source: MDPI journal article supplement (doi:10.3390/molecules26092775), 2021-05-08
Supplement: s1 [file s1]

# Ti group metallocene-catalyzed synthesis of 1-hexene dimers and tetramers

Pavel Kovyazin, Almira Bikmeeva, Denis Islamov, Vasiliy Yanybin, Tatyana Tyumkina and Lyudmila Parfenova \*

Institute of Petrochemistry and Catalysis of Russian Academy of Sciences, Prospekt Oktyabrya, 141, 450075 Ufa, Russia; kpv38@mail.ru (P.V.K.); almira.bikmeeva@gmail.com (A.K.B.); islamov19@gmail.com (D.N.I.); vyanybin@gmail.com (V.M.Y.); ttvnmr@gmail.com (T.V.T.)

\* Correspondence: luda\_parfenova@ipc-ras.ru; Tel.: +7-347-284-3527

|                                                                                                                                                                      |    |
|----------------------------------------------------------------------------------------------------------------------------------------------------------------------|----|
| <b>Figure S1.</b> $^1\text{H}$ NMR of system $\text{Cp}_2\text{ZrCl}_2\text{-HAIBu}_2$ (1:4) in $\text{CDCl}_3$ (T= 299 K).....                                      | 3  |
| <b>Figure S2.</b> $^{13}\text{C}$ NMR of system $\text{Cp}_2\text{ZrCl}_2\text{-HAIBu}_2$ (1:4) in $\text{CDCl}_3$ (T= 299 K). ....                                  | 3  |
| <b>Figure S3.</b> $^1\text{H}$ NMR of system $\text{Cp}_2\text{ZrCl}_2\text{-HAIBu}_2\text{-MMAO-12- 1-hexene}$ (1:4:8:0.1) in $\text{CDCl}_3$ (T= 299 K).....       | 4  |
| <b>Figure S4.</b> $^{13}\text{C}$ NMR of system $\text{Cp}_2\text{ZrCl}_2\text{-HAIBu}_2\text{-MMAO-12- 1-hexene}$ (1:4:8:0.1) in $\text{CDCl}_3$ (T= 299 K).....    | 5  |
| <b>Figure S5.</b> $^1\text{H}$ NMR of system $\text{Cp}_2\text{ZrCl}_2\text{-HAIBu}_2$ (1:2) in $\text{CD}_2\text{Cl}_2$ (T= 298.6 K).....                           | 6  |
| <b>Figure S6.</b> $^{13}\text{C}$ NMR of system $\text{Cp}_2\text{ZrCl}_2\text{-HAIBu}_2$ (1:2) in $\text{CD}_2\text{Cl}_2$ (T= 298.6 K).....                        | 7  |
| <b>Figure S7.</b> $^1\text{H}$ NMR of system $\text{Cp}_2\text{ZrCl}_2\text{-HAIBu}_2\text{-MMAO-12}$ (1:2:5) in $\text{CD}_2\text{Cl}_2$ (T= 298.6 K).8             |    |
| <b>Figure S8.</b> $^{13}\text{C}$ NMR of system $\text{Cp}_2\text{ZrCl}_2\text{-HAIBu}_2\text{-MMAO-12}$ (1:2:5) in $\text{CD}_2\text{Cl}_2$ (T= 299.3 K).<br>.....  | 9  |
| <b>Figure S9.</b> $^1\text{H}$ NMR of system $[\text{Cp}_2\text{ZrH}_2]_2\text{-CIAIBu}_2$ (1:2) in $\text{CDCl}_3$ (T= 298.7 K). ....                               | 10 |
| <b>Figure S10.</b> $^{13}\text{C}$ NMR of system $[\text{Cp}_2\text{ZrH}_2]_2\text{-CIAIBu}_2$ (1:2) in $\text{CDCl}_3$ (T= 299.1 K). ....                           | 11 |
| <b>Figure S11.</b> $^1\text{H}$ NMR of system $[\text{Cp}_2\text{ZrH}_2]_2\text{-CIAIBu}_2\text{-MMAO-12}$ (1:2:11) in $\text{CDCl}_3$ (T= 299 K).<br>.....          | 11 |
| <b>Figure S12.</b> $^{13}\text{C}$ NMR of system $[\text{Cp}_2\text{ZrH}_2]_2\text{-CIAIBu}_2\text{-MMAO-12}$ (1:2:11) in $\text{CDCl}_3$ (T= 299.2 K). ....         | 12 |
| <b>Figure S13.</b> COSY HH of system $[\text{Cp}_2\text{ZrH}_2]_2\text{-CIAIBu}_2\text{-MMAO-12}$ (1:2:11) in $\text{CDCl}_3$ (T= 298.7 K). ....                     | 13 |
| <b>Figure S14.</b> $^1\text{H}$ NMR of system $[\text{Cp}_2\text{ZrH}_2]_2\text{-CIAIBu}_2$ (1:2) in $\text{CD}_2\text{Cl}_2$ (T= 299.1 K).....                      | 14 |
| <b>Figure S15.</b> $^{13}\text{C}$ NMR of system $[\text{Cp}_2\text{ZrH}_2]_2\text{-CIAIBu}_2$ (1:2) in $\text{CD}_2\text{Cl}_2$ (T= 299.7 K). ....                  | 15 |
| <b>Figure S16.</b> $^1\text{H}$ NMR of system $[\text{Cp}_2\text{ZrH}_2]_2\text{-CIAIBu}_2\text{-MMAO-12}$ (1:2:5) in $\text{CD}_2\text{Cl}_2$ (T= 299.1 K). ....    | 15 |
| <b>Figure S17.</b> $^{13}\text{C}$ NMR of system $[\text{Cp}_2\text{ZrH}_2]_2\text{-CIAIBu}_2\text{-MMAO-12}$ (1:2:5) in $\text{CD}_2\text{Cl}_2$ (T= 299.5 K). .... | 16 |

|                                                                                                                                                                                                                                                                                                            |    |
|------------------------------------------------------------------------------------------------------------------------------------------------------------------------------------------------------------------------------------------------------------------------------------------------------------|----|
| <b>Figure S18.</b> COSY HH NMR of system $[\text{Cp}_2\text{ZrH}_2]_2\text{-CIAIBu}^i_2\text{-MMAO-12}$ (1:2:5) in $\text{CD}_2\text{Cl}_2$ (T= 298.7 K). .....                                                                                                                                            | 17 |
| <b>Figure S19.</b> $^{13}\text{C}$ of system $[\text{Cp}_2\text{ZrH}_2]_2\text{-MMAO-12}$ (1:12) in $\text{CDCl}_3$ (T= 296.1 K). .....                                                                                                                                                                    | 18 |
| <b>Figure S20.</b> COSY HH NMR of of system $[\text{Cp}_2\text{ZrH}_2]_2\text{-MMAO-12}$ (1:12) in $\text{CDCl}_3$ (T= 296 K). .....                                                                                                                                                                       | 19 |
| <b>Figure S21.</b> $^1\text{H}$ of system $[\text{Cp}_2\text{ZrH}_2]_2\text{-MMAO-12}$ (1:7) in $\text{CD}_2\text{Cl}_2$ (T= 296.3 K). .....                                                                                                                                                               | 20 |
| <b>Figure S22.</b> $^{13}\text{C}$ NMR of system $[\text{Cp}_2\text{ZrH}_2]_2\text{-MMAO-12}$ (1:7) in $\text{CD}_2\text{Cl}_2$ (T= 296.6 K). .....                                                                                                                                                        | 20 |
| <b>Figure S23.</b> COSY HH of system $[\text{Cp}_2\text{ZrH}_2]_2\text{-MMAO-12}$ (1:7) in $\text{CD}_2\text{Cl}_2$ (T= 296 K). .....                                                                                                                                                                      | 21 |
| <b>Figure S24.</b> $^1\text{H}$ NMR of dimer <b>5</b> obtained in the system $\text{Cp}_2\text{ZrCl}_2\text{-HAIBu}^i_2\text{-MMAO-12}$ , $[\text{Zr}]:[\text{Al}]:[\text{MMAO-12}]:[1\text{-alkene}]=1:4:8:1$ in $\text{CDCl}_3$ (T= 298.7 K), 20 min. ....                                               | 22 |
| <b>Figure S25.</b> $^{13}\text{C}$ NMR of dimer <b>5</b> obtained in the system $\text{Cp}_2\text{ZrCl}_2\text{-HAIBu}^i_2\text{-MMAO-12}$ , $[\text{Zr}]:[\text{Al}]:[\text{MMAO-12}]:[1\text{-alkene}]=1:4:8:1$ in $\text{CDCl}_3$ (T= 298.7 K), 20 min. ....                                            | 23 |
| <b>Figure S26.</b> $^1\text{H}$ NMR of tetramers <b>7</b> obtained in the system $\text{Cp}_2\text{ZrCl}_2\text{-HAIBu}^i_2\text{-(Ph}_3\text{C)[B(C}_6\text{F}_5)_4]$ , $[\text{Zr}]:[\text{Al}]:[\text{B}]:[1\text{-alkene}]=4:16:1:1000$ , $\text{CHCl}_3$ , $40^\circ\text{C}$ , 16 h. ....            | 24 |
| <b>Figure S27.</b> $^{13}\text{C}$ NMR of tetramers <b>7</b> obtained in the system $\text{Cp}_2\text{ZrCl}_2\text{-HAIBu}^i_2\text{-(Ph}_3\text{C)[B(C}_6\text{F}_5)_4]$ , $[\text{Zr}]:[\text{Al}]:[\text{B}]:[1\text{-alkene}]=4:16:1:1000$ , $\text{CHCl}_3$ , $40^\circ\text{C}$ , 16 h. ....         | 25 |
| <b>GC-MS analysis of products</b> .....                                                                                                                                                                                                                                                                    | 25 |
| <b>Figure S28.</b> Example of GC-MS analysis of dimers and oligomers obtained in the system $[\text{Cp}_2\text{ZrH}_2]_2\text{-CIAIBu}^i_2\text{-MMAO-12}$ , $[\text{Zr}]:[\text{Al}]:[\text{MMAO-12}]:[1\text{-alkene}]=1:3:30:1000$ , $\text{CH}_2\text{Cl}_2$ , $40^\circ\text{C}$ , 16 h. ....         | 26 |
| <b>Figure S29.</b> Example of GC-MS analysis of dimers and oligomers obtained in the system $\text{Cp}_2\text{ZrCl}_2\text{-HAIBu}^i_2\text{-(Ph}_3\text{C)[B(C}_6\text{F}_5)_4]$ , $[\text{Zr}]:[\text{Al}]:[\text{B}]:[1\text{-alkene}]=4:16:1:1000$ , $\text{CHCl}_3$ , $40^\circ\text{C}$ , 16 h. .... | 27 |
| <b>Table S1.</b> The energy at 0K, the ZPVE correction, the enthalpy, the Gibbs free energy in gas, the temperature multiplied by the entropy for complexes <b>9a-e</b> , calculated at PBE/3 $\zeta$ level (298.15 K). ....                                                                               | 29 |
| <b>Table S2.</b> Relative thermodynamic parameters of isomeric complexes <b>9a-d</b> , calculated at PBE0/def2TZVP level (298.15 K). ....                                                                                                                                                                  | 29 |
| <b>Table S3.</b> Relative thermodynamic parameters of isomeric complexes <b>9a-d</b> , calculated at PBE0-GD3/def2TZVP level (298.15 K). ....                                                                                                                                                              | 29 |
| <b>Table S4.</b> Relative thermodynamic parameters isomeric complexes <b>9a-d</b> in $\text{CHCl}_3$ solution, calculated at PBE0/def2TZVP level (298.15 K). ....                                                                                                                                          | 29 |
| <b>Table S5.</b> Relative thermodynamic parameters of isomeric complexes <b>9a-d</b> in $\text{CH}_2\text{Cl}_2$ solution, calculated at PBE0/def2TZVP level (298.15 K). ....                                                                                                                              | 29 |
| Atomic coordinates of the complexes <b>9a-e</b> .....                                                                                                                                                                                                                                                      | 31 |

**Figure S1.**  $^1\text{H}$  NMR of system  $\text{Cp}_2\text{ZrCl}_2\text{-HAIBu}^i_2$  (1:4) in  $\text{CDCl}_3$  (T= 299 K).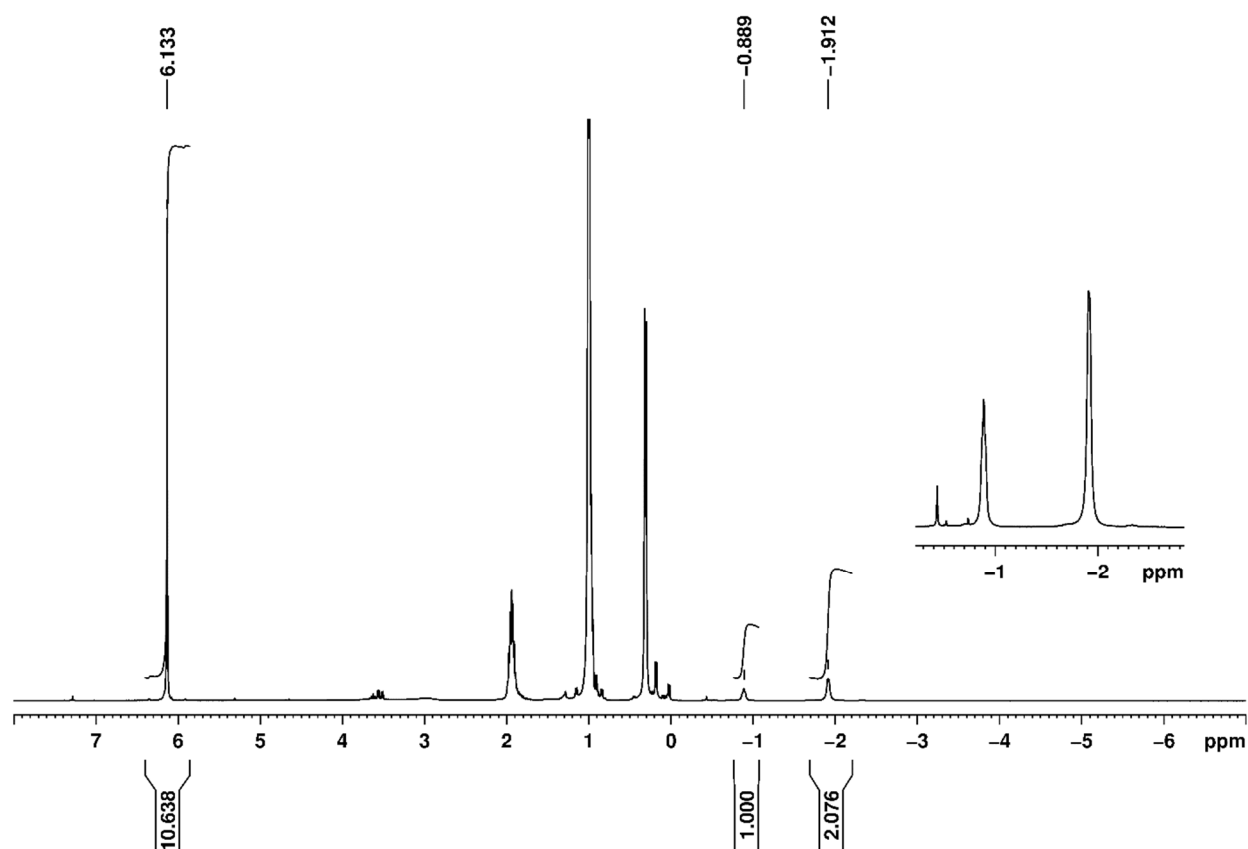**Figure S2.**  $^{13}\text{C}$  NMR of system  $\text{Cp}_2\text{ZrCl}_2\text{-HAIBu}^i_2$  (1:4) in  $\text{CDCl}_3$  (T= 299 K).

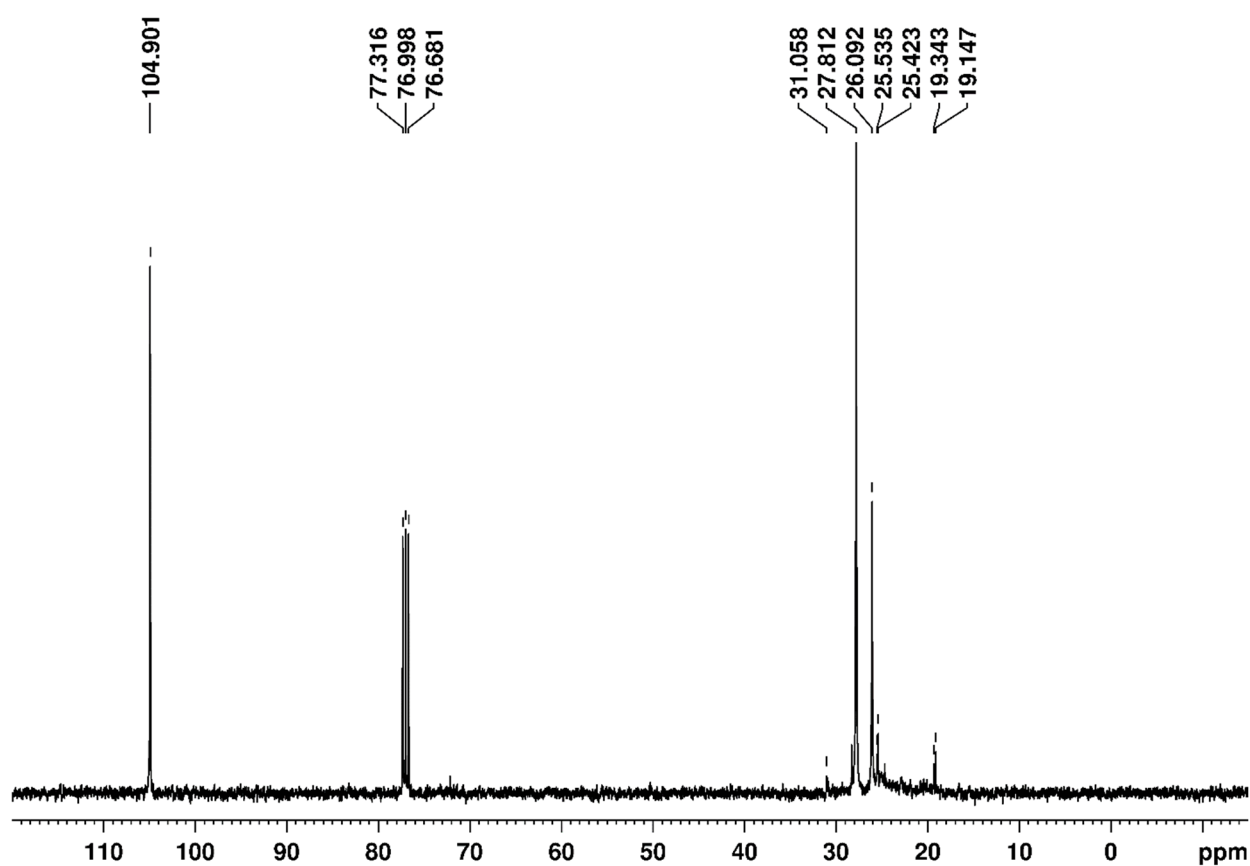

**Figure S3.**  $^1\text{H}$  NMR of system  $\text{Cp}_2\text{ZrCl}_2\text{-HAlBu}_2\text{-MMAO-12-1-hexene}$  (1:4:8:0.1) in  $\text{CDCl}_3$  (T = 299 K).

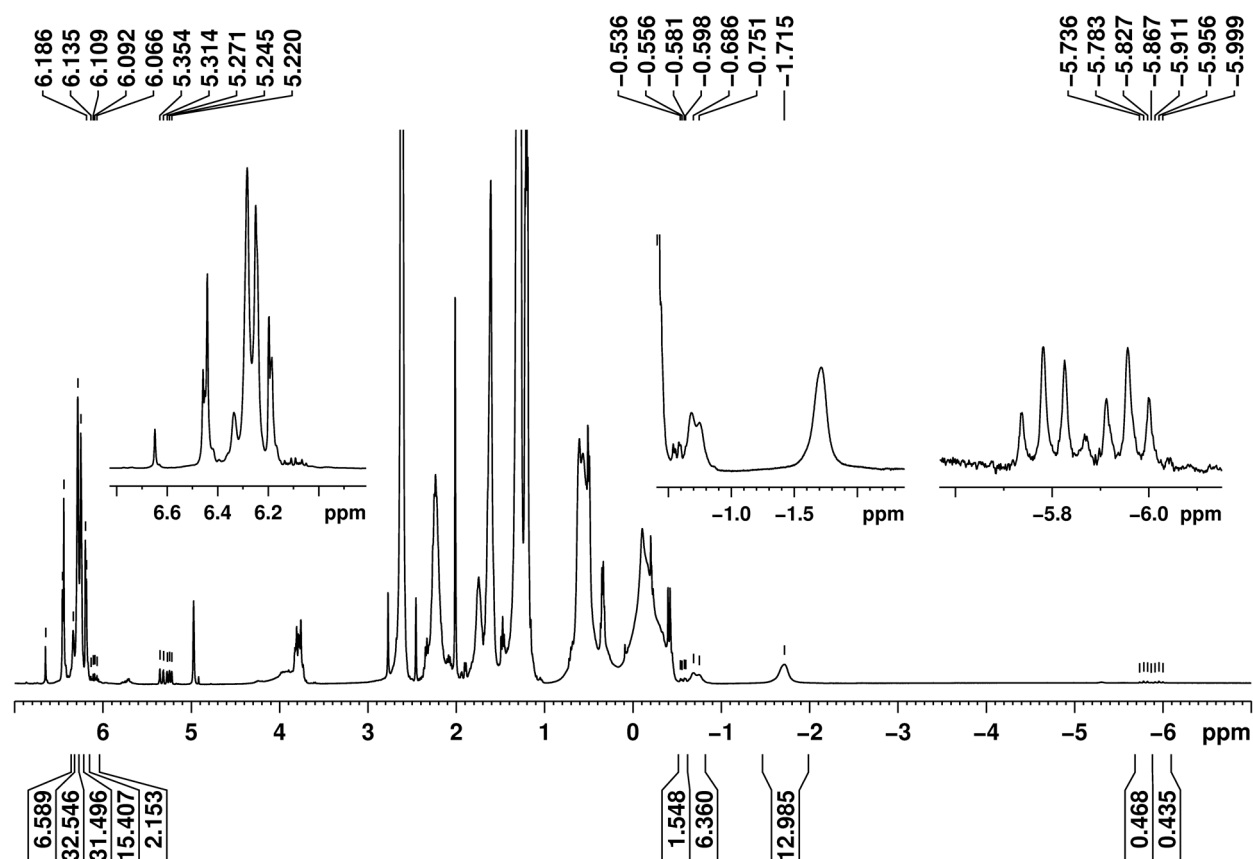

**Figure S4.**  $^{13}\text{C}$  NMR of system  $\text{Cp}_2\text{ZrCl}_2\text{-HAIBu}_i^2\text{-MMAO-12-1-hexene}$  (1:4:8:0.1) in  $\text{CDCl}_3$  (T= 299 K).

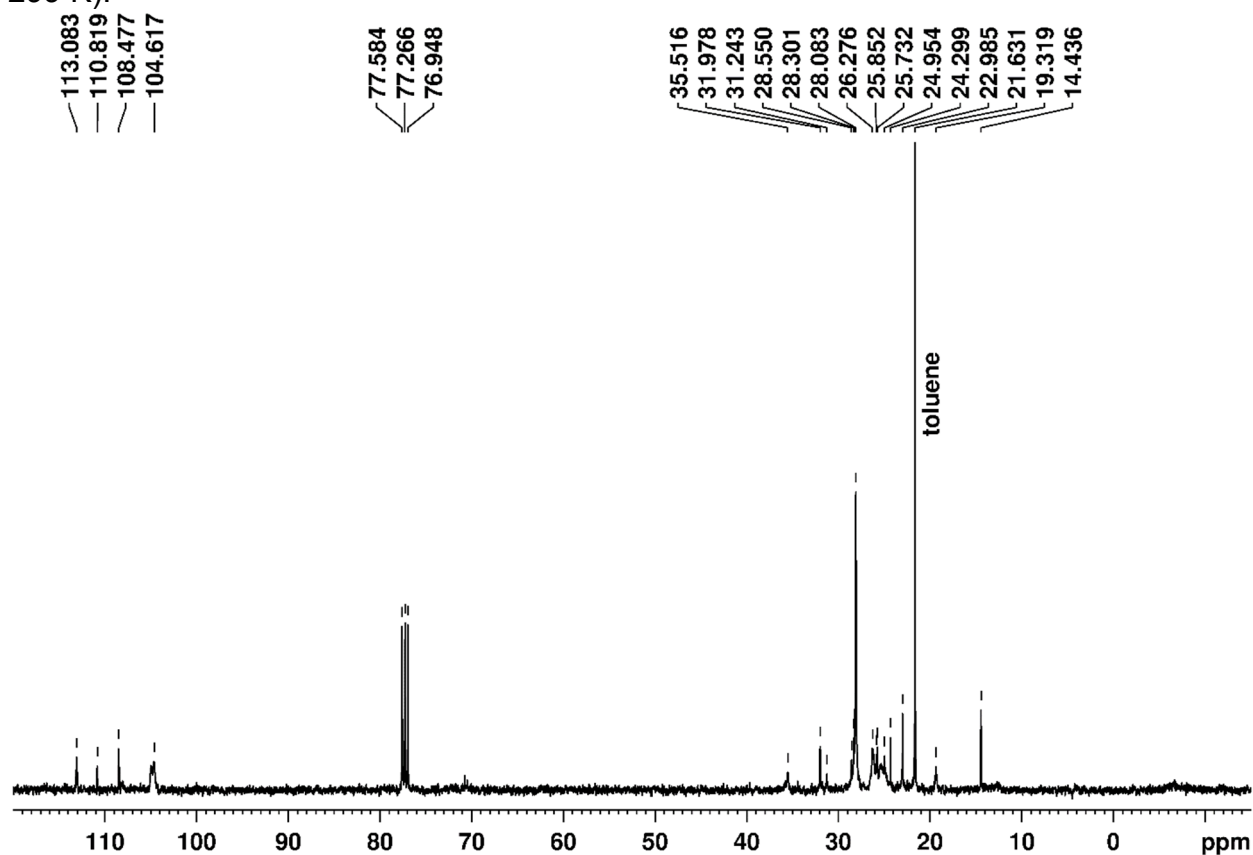

**Figure S5.**  $^1\text{H}$  NMR of system  $\text{Cp}_2\text{ZrCl}_2\text{-HAIBu}_2$  (1:2) in  $\text{CD}_2\text{Cl}_2$  ( $T = 298.6\text{ K}$ ).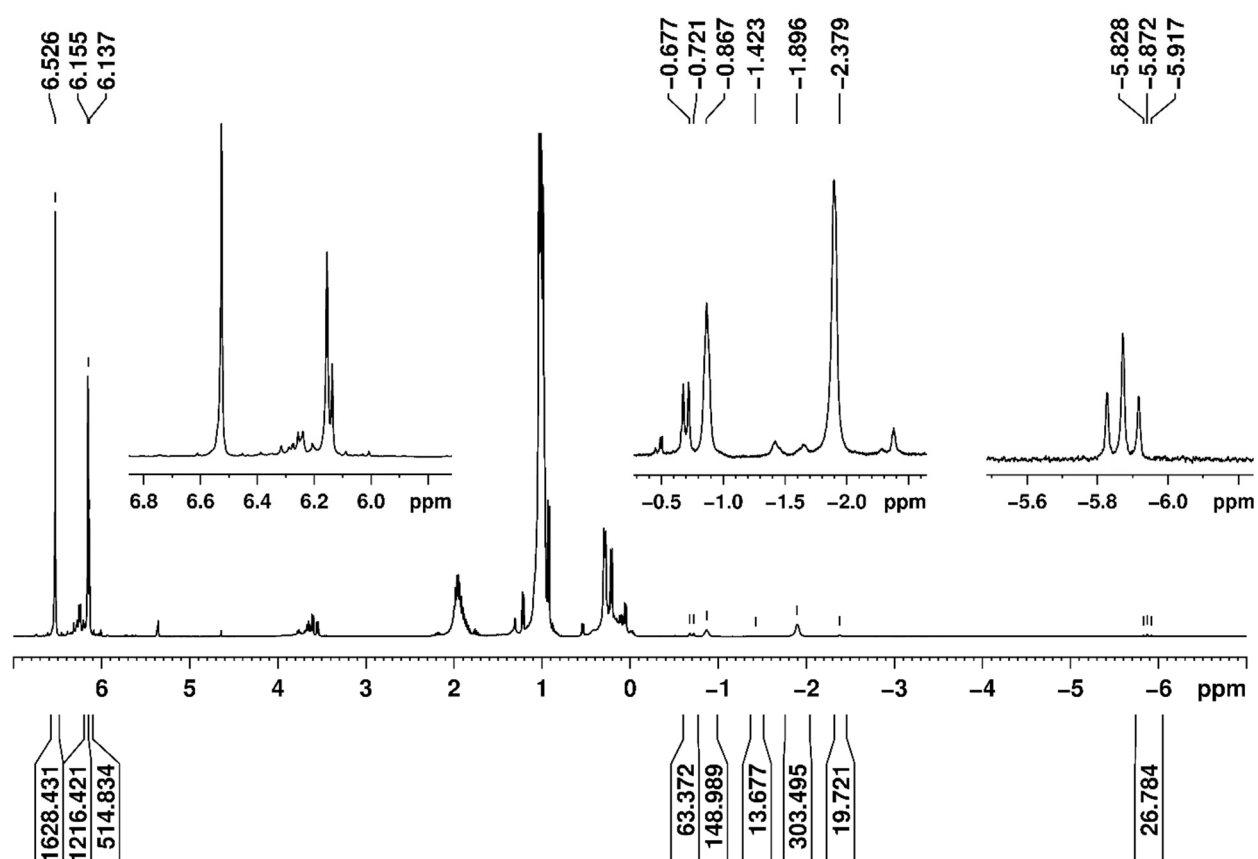

**Figure S6.**  $^{13}\text{C}$  NMR of system  $\text{Cp}_2\text{ZrCl}_2\text{-HAIBu}_2$  (1:2) in  $\text{CD}_2\text{Cl}_2$  ( $T = 298.6\text{ K}$ ).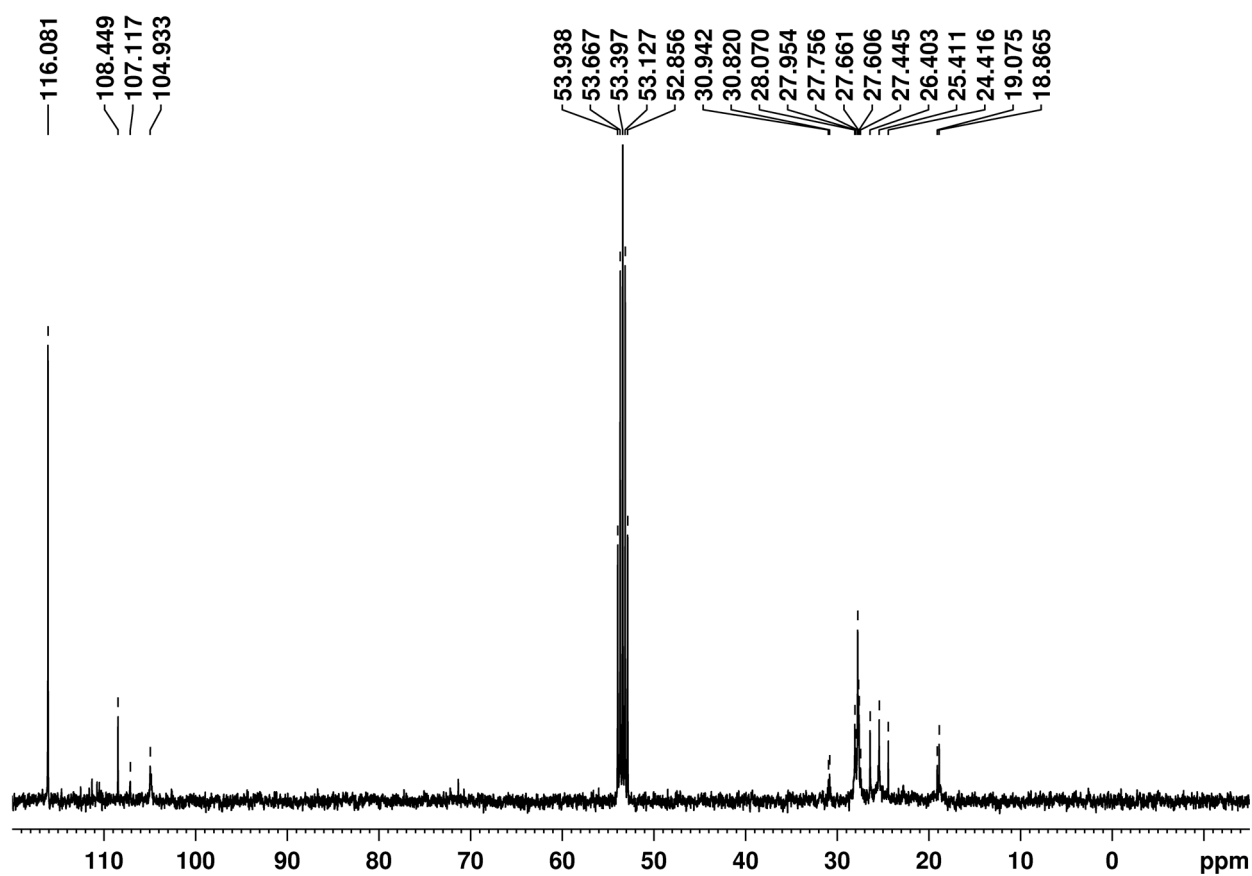

**Figure S7.**  $^1\text{H}$  NMR of system  $\text{Cp}_2\text{ZrCl}_2\text{-HAIBu}_2\text{-MMAO-12}$  (1:2:5) in  $\text{CD}_2\text{Cl}_2$  ( $T = 298.6\text{ K}$ ).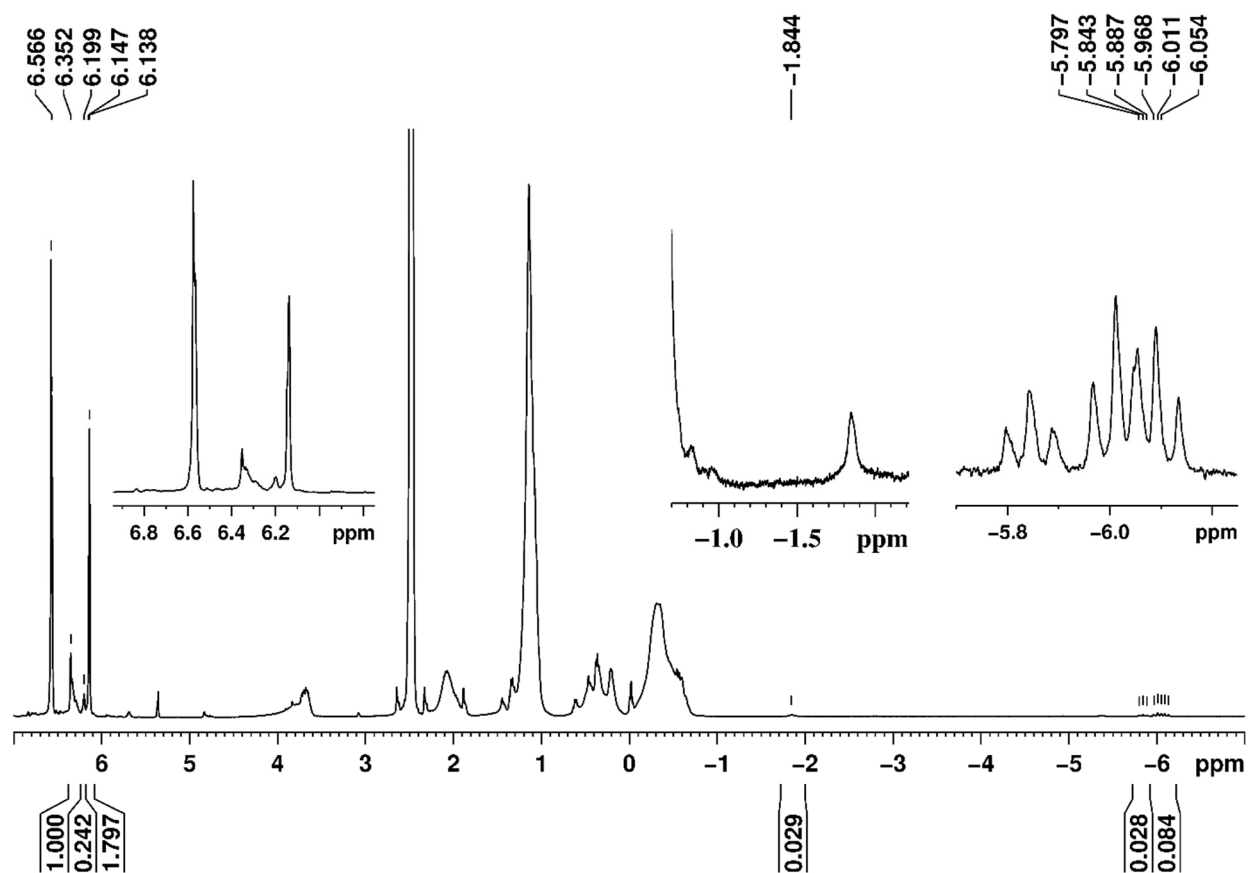



**Figure S8.**  $^{13}\text{C}$  NMR of system  $\text{Cp}_2\text{ZrCl}_2\text{-HAIBu}_2\text{-MMAO-12}$  (1:2:5) in  $\text{CD}_2\text{Cl}_2$  ( $T = 299.3\text{ K}$ ).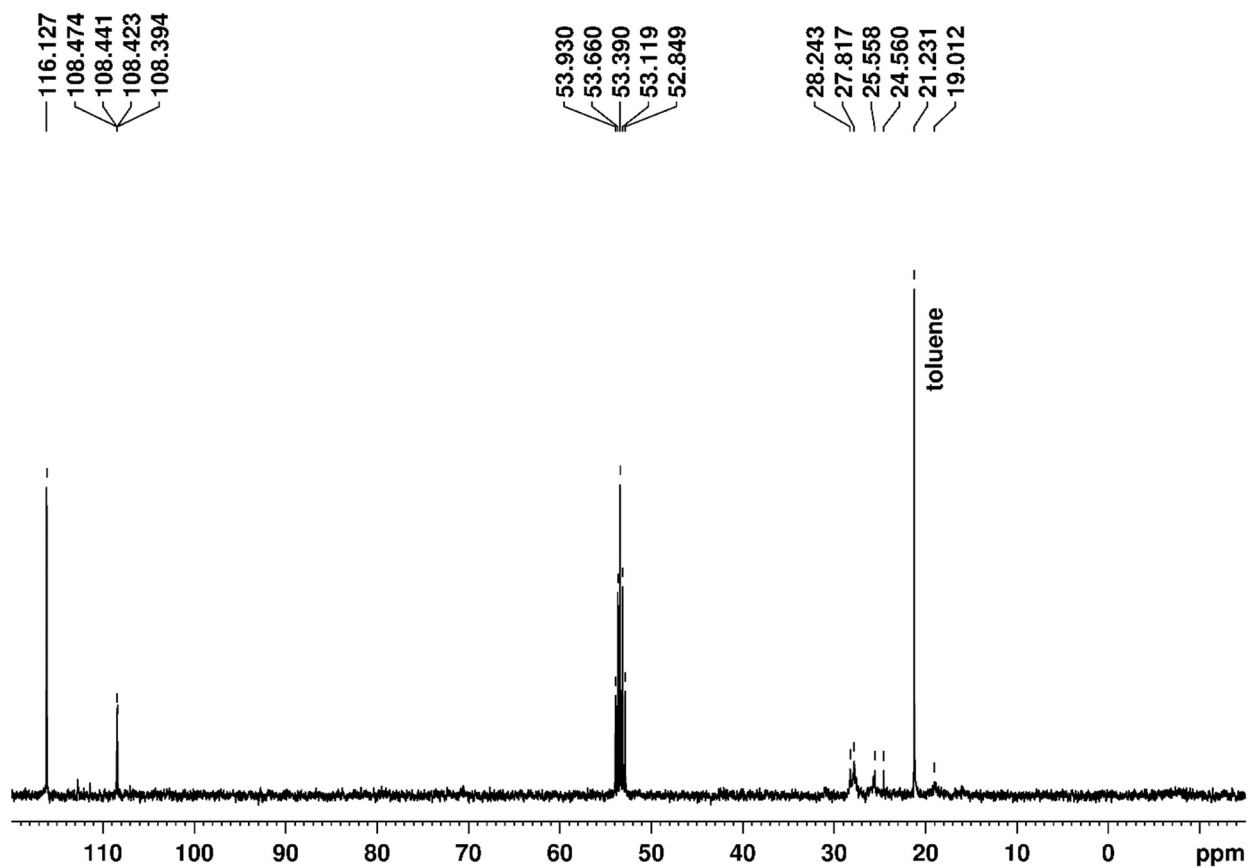

**Figure S9.**  $^1\text{H}$  NMR of system  $[\text{Cp}_2\text{ZrH}_2]_2\text{-ClAlBu}_2^i$  (1:2) in  $\text{CDCl}_3$  ( $T = 298.7\text{ K}$ ).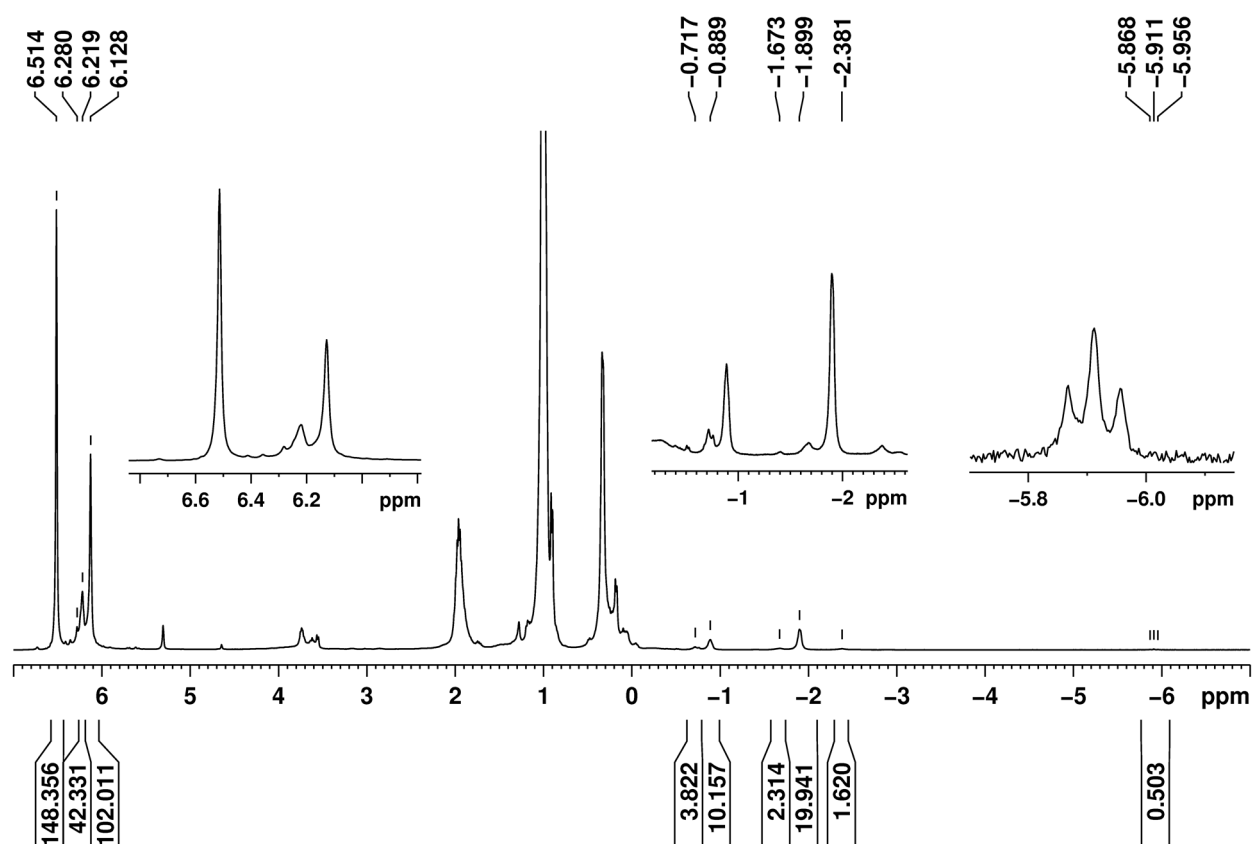

**Figure S10.**  $^{13}\text{C}$  NMR of system  $[\text{Cp}_2\text{ZrH}_2]_2\text{-ClAlBu}_2^i$  (1:2) in  $\text{CDCl}_3$  ( $T = 299.1\text{ K}$ ).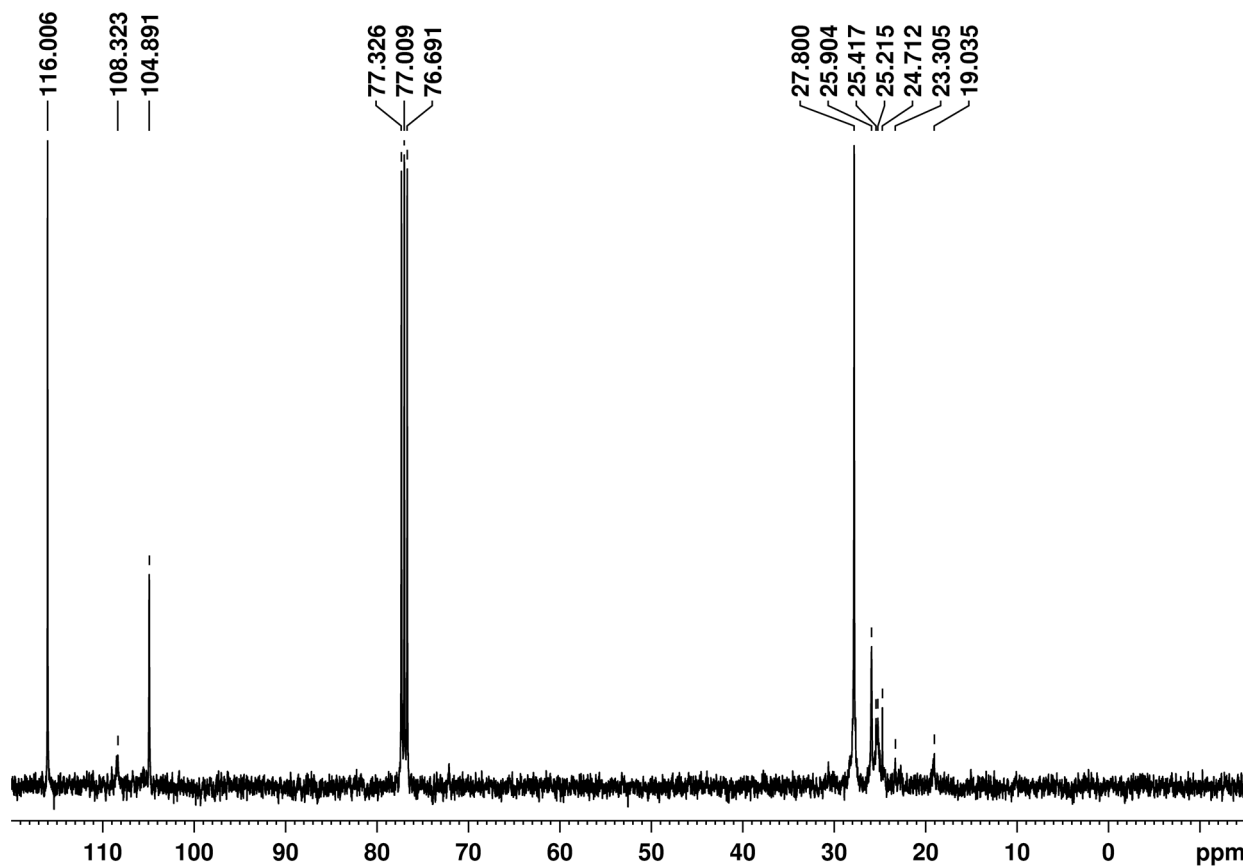**Figure S11.**  $^1\text{H}$  NMR of system  $[\text{Cp}_2\text{ZrH}_2]_2\text{-ClAlBu}_2\text{-MMAO-12}$  (1:2:11) in  $\text{CDCl}_3$  ( $T = 299\text{ K}$ ).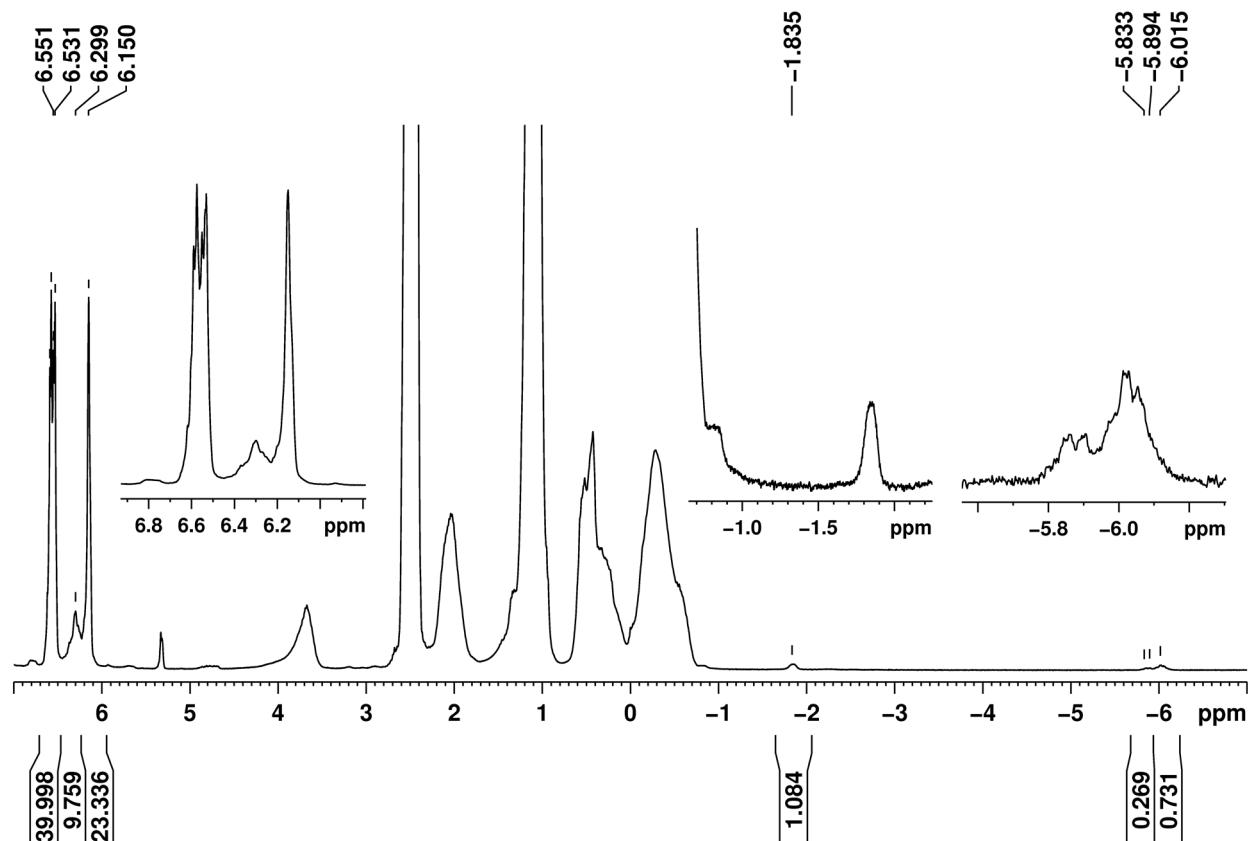

**Figure S12.**  $^{13}\text{C}$  NMR of system  $[\text{Cp}_2\text{ZrH}_2]_2\text{-ClAlBu}_2\text{-MMAO-12}$  (1:2:11) in  $\text{CDCl}_3$  ( $T = 299.2\text{ K}$ ).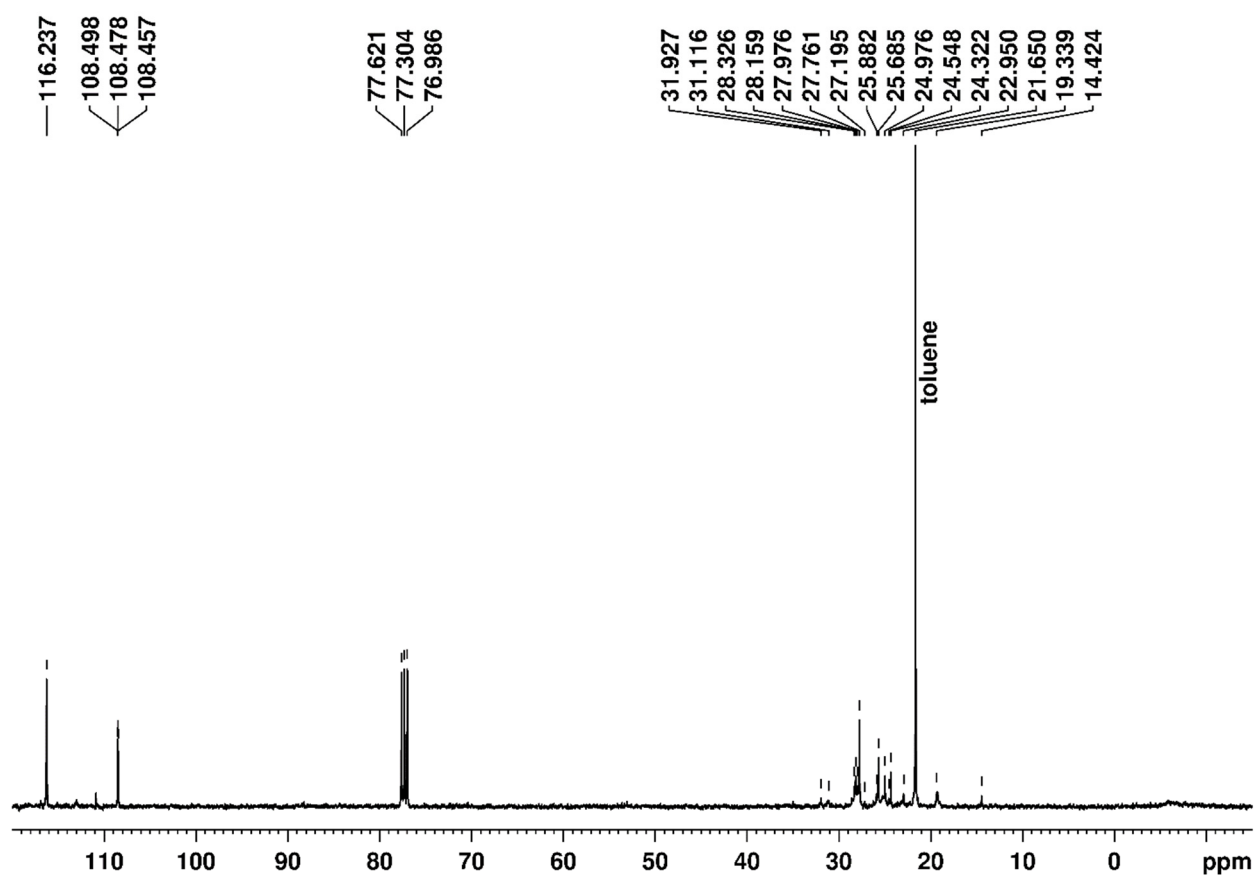

**Figure S13.** COSY HH of system  $[\text{Cp}_2\text{ZrH}_2]_2\text{-ClAlBu}_2\text{-MMAO-12}$  (1:2:11) in  $\text{CDCl}_3$  ( $T = 298.7 \text{ K}$ ).

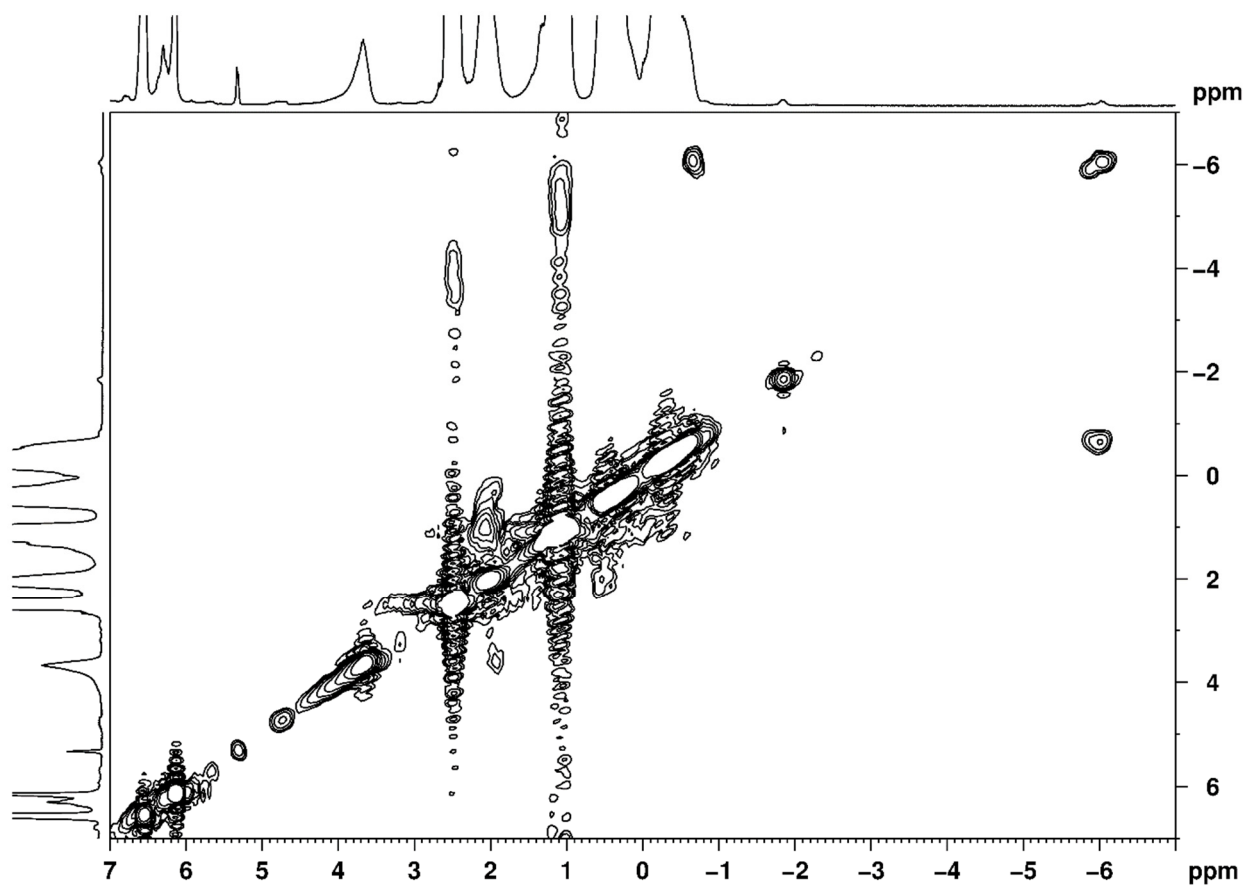

**Figure S14.**  $^1\text{H}$  NMR of system  $[\text{Cp}_2\text{ZrH}_2]_2\text{-ClAlBu}_2$  (1:2) in  $\text{CD}_2\text{Cl}_2$  ( $T = 299.1\text{ K}$ ).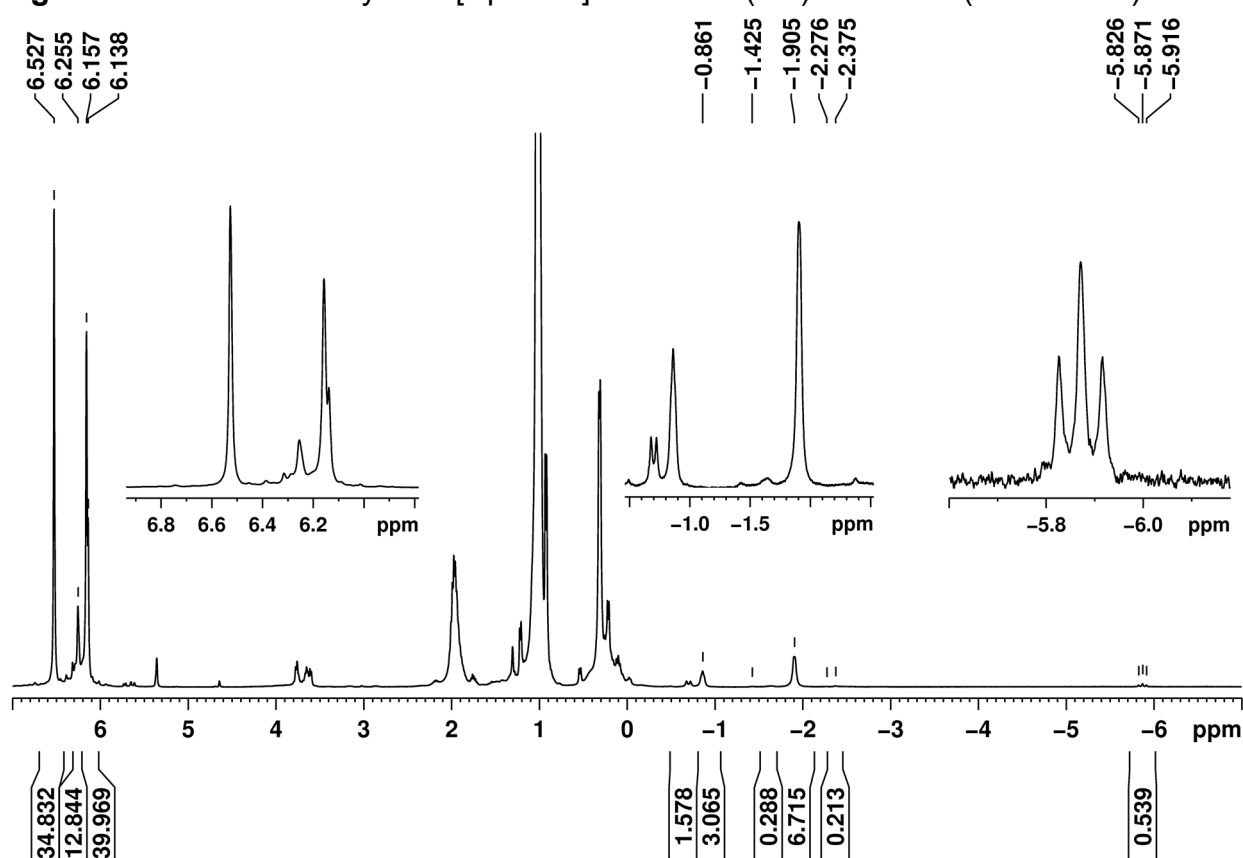

**Figure S15.**  $^{13}\text{C}$  NMR of system  $[\text{Cp}_2\text{ZrH}_2]_2\text{-ClAlBu}_2^i$  (1:2) in  $\text{CD}_2\text{Cl}_2$  ( $T = 299.7\text{ K}$ ).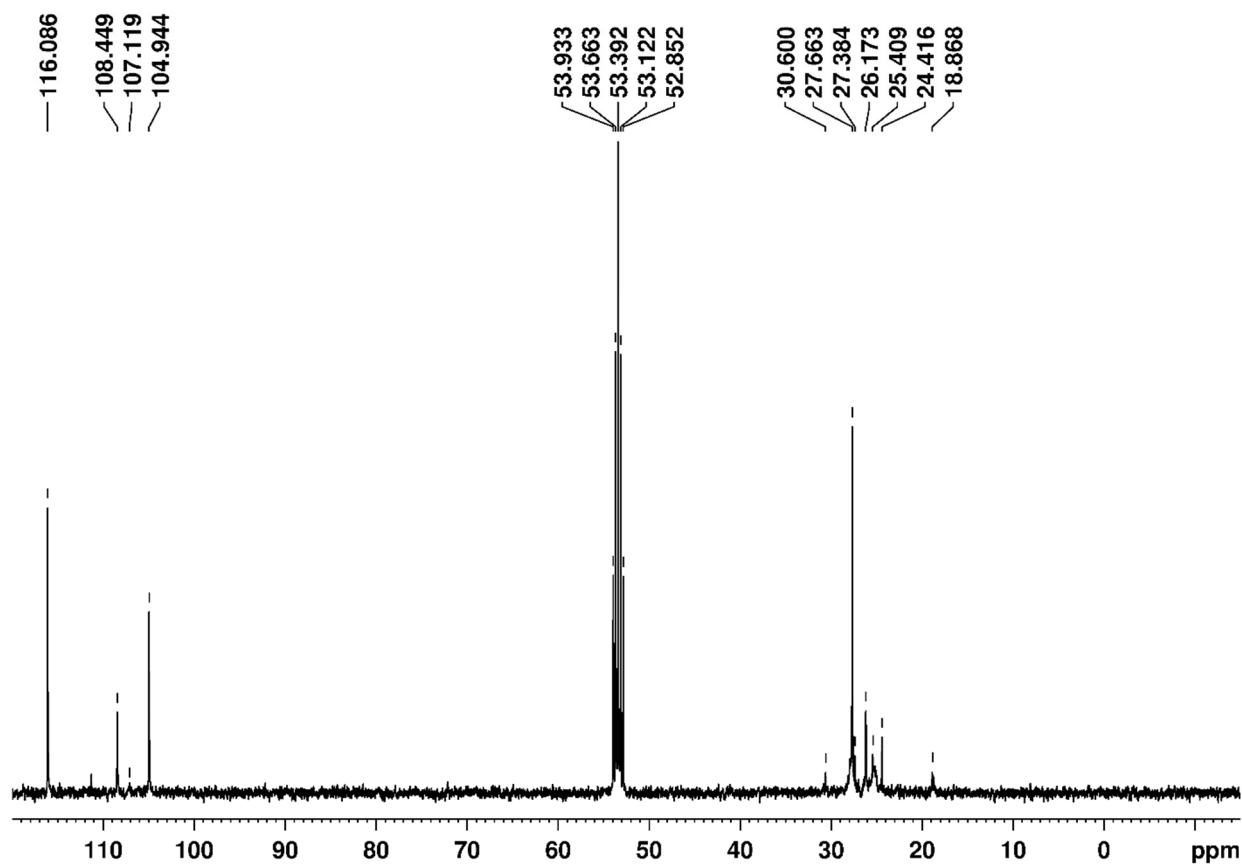**Figure S16.**  $^1\text{H}$  NMR of system  $[\text{Cp}_2\text{ZrH}_2]_2\text{-ClAlBu}_2^i\text{-MMAO-12}$  (1:2:5) in  $\text{CD}_2\text{Cl}_2$  ( $T = 299.1\text{ K}$ ).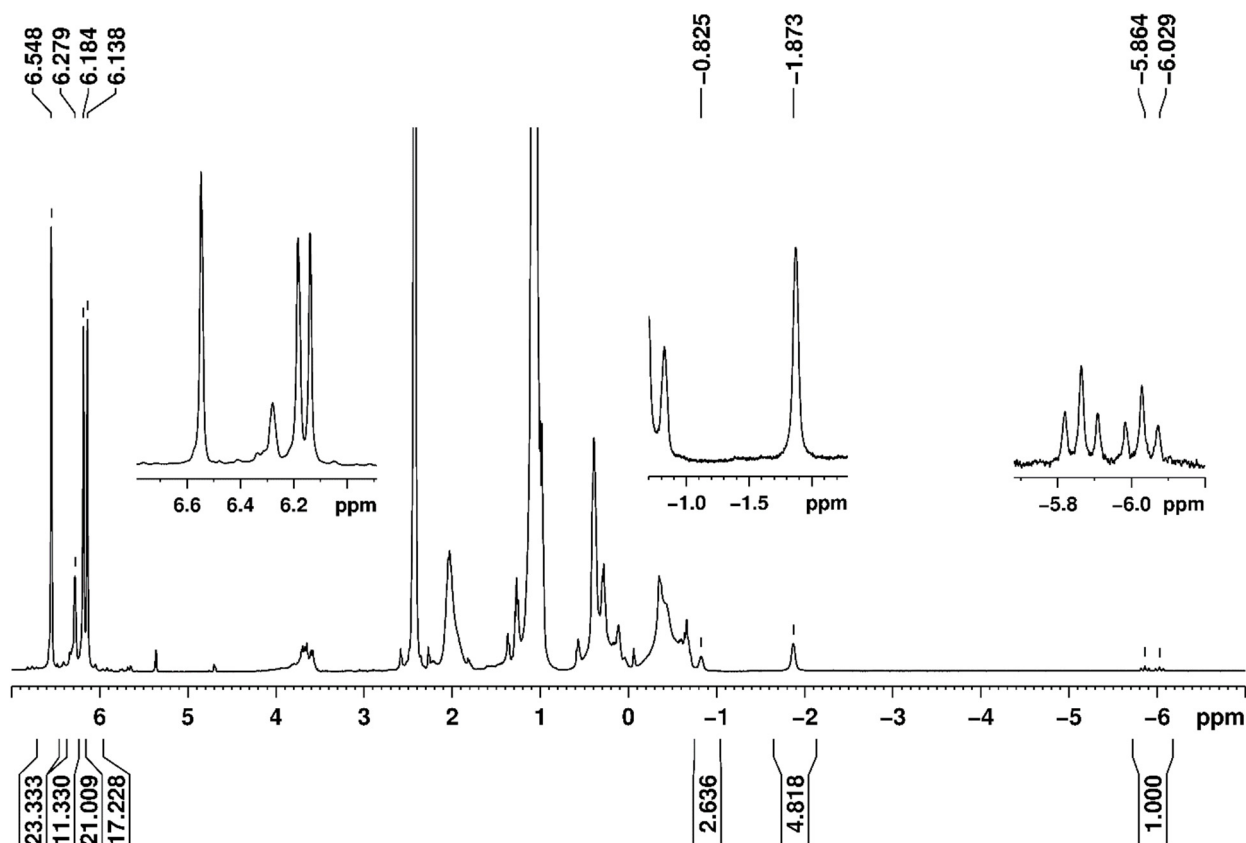

**Figure S17.**  $^{13}\text{C}$  NMR of system  $[\text{Cp}_2\text{ZrH}_2]_2\text{-ClAlBu}_2^{\text{i}}\text{-MMAO-12}$  (1:2:5) in  $\text{CD}_2\text{Cl}_2$  ( $T = 299.5\text{ K}$ ).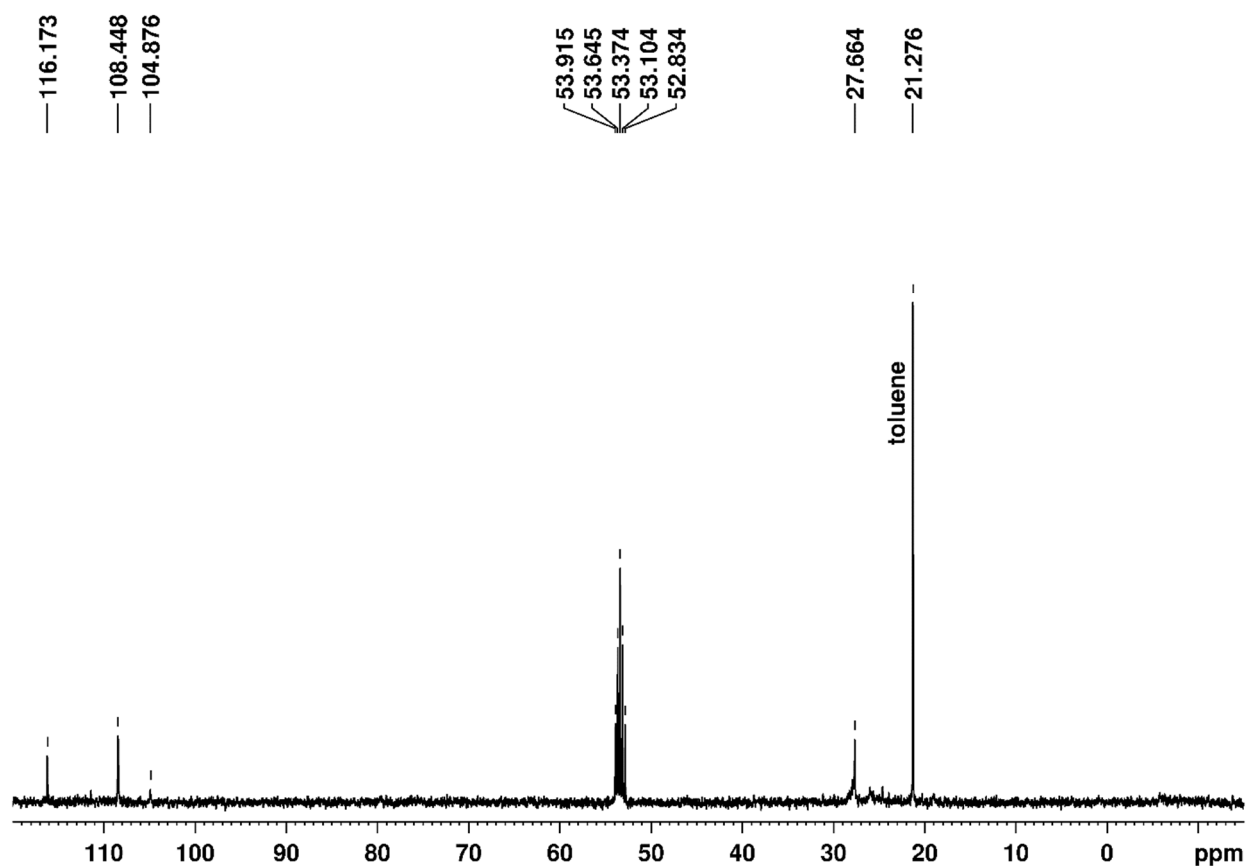



**Figure S18.** COSY HH NMR of system  $[\text{Cp}_2\text{ZrH}_2]_2\text{-ClAlBu}^i_2\text{-MMAO-12}$  (1:2:5) in  $\text{CD}_2\text{Cl}_2$  ( $T = 298.7$  K).

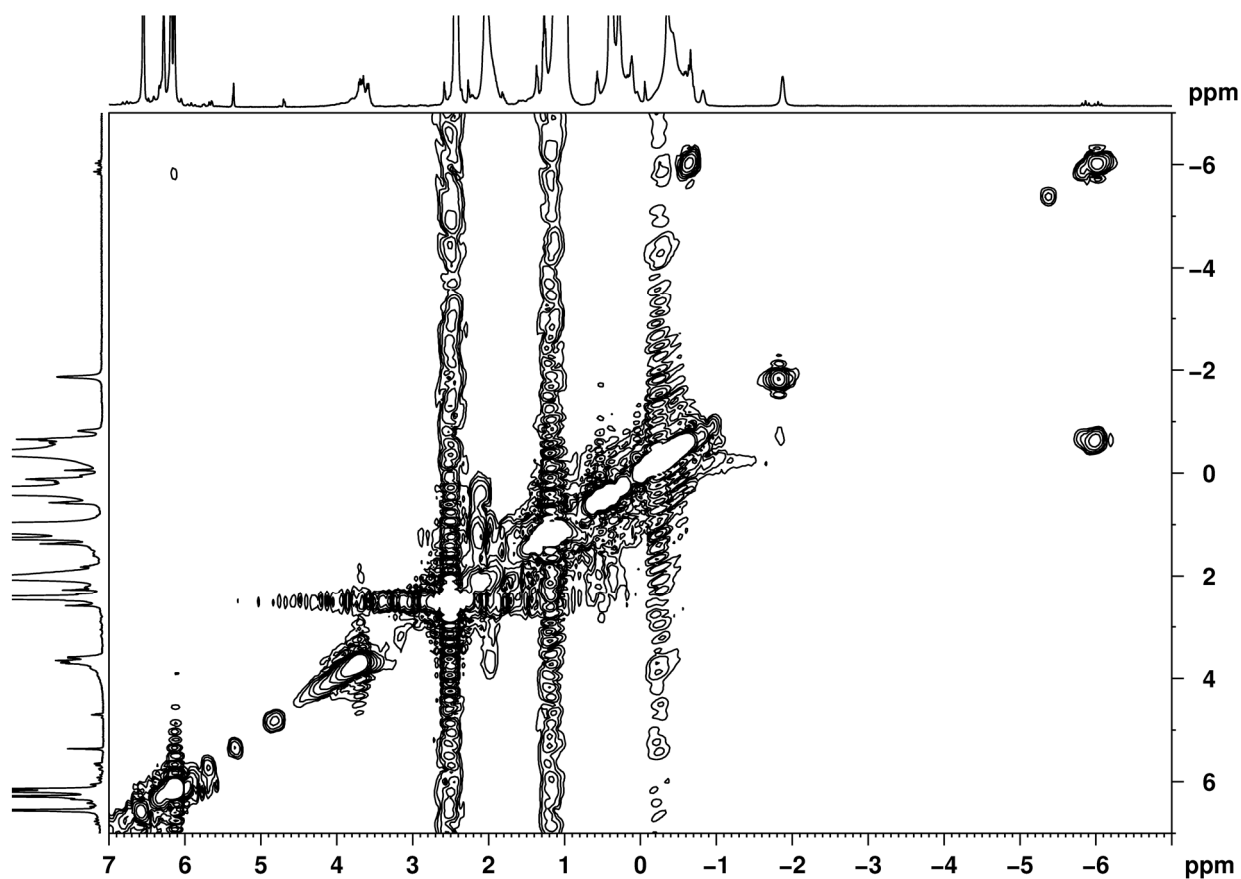

**Figure S19.**  $^{13}\text{C}$  of system  $[\text{Cp}_2\text{ZrH}_2]_2 - \text{MMAO-12}$  (1:12) in  $\text{CDCl}_3$  ( $T = 296.1 \text{ K}$ ).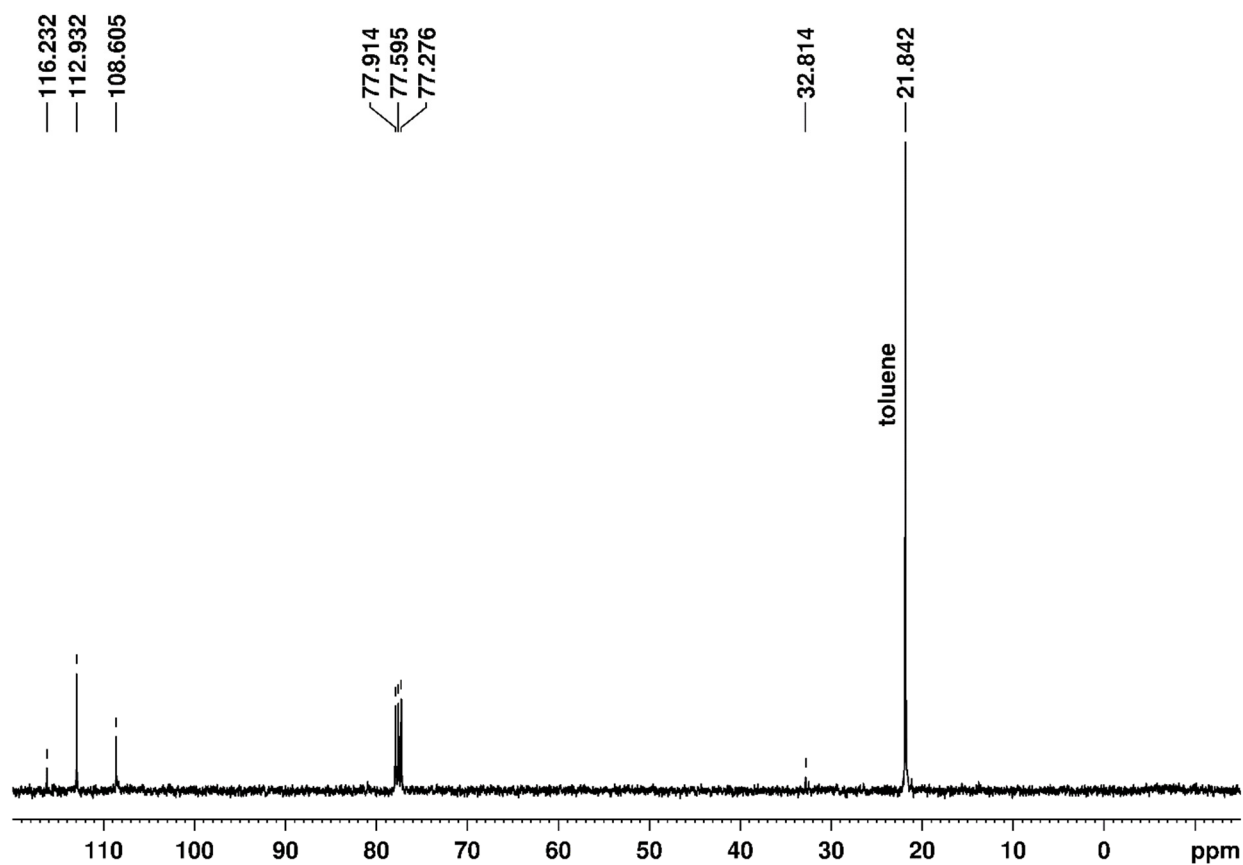

**Figure S20.** COSY HH NMR of of system  $[\text{Cp}_2\text{ZrH}_2]_2\text{-MMAO-12}$  (1:12) in  $\text{CDCl}_3$  ( $T=296\text{ K}$ ).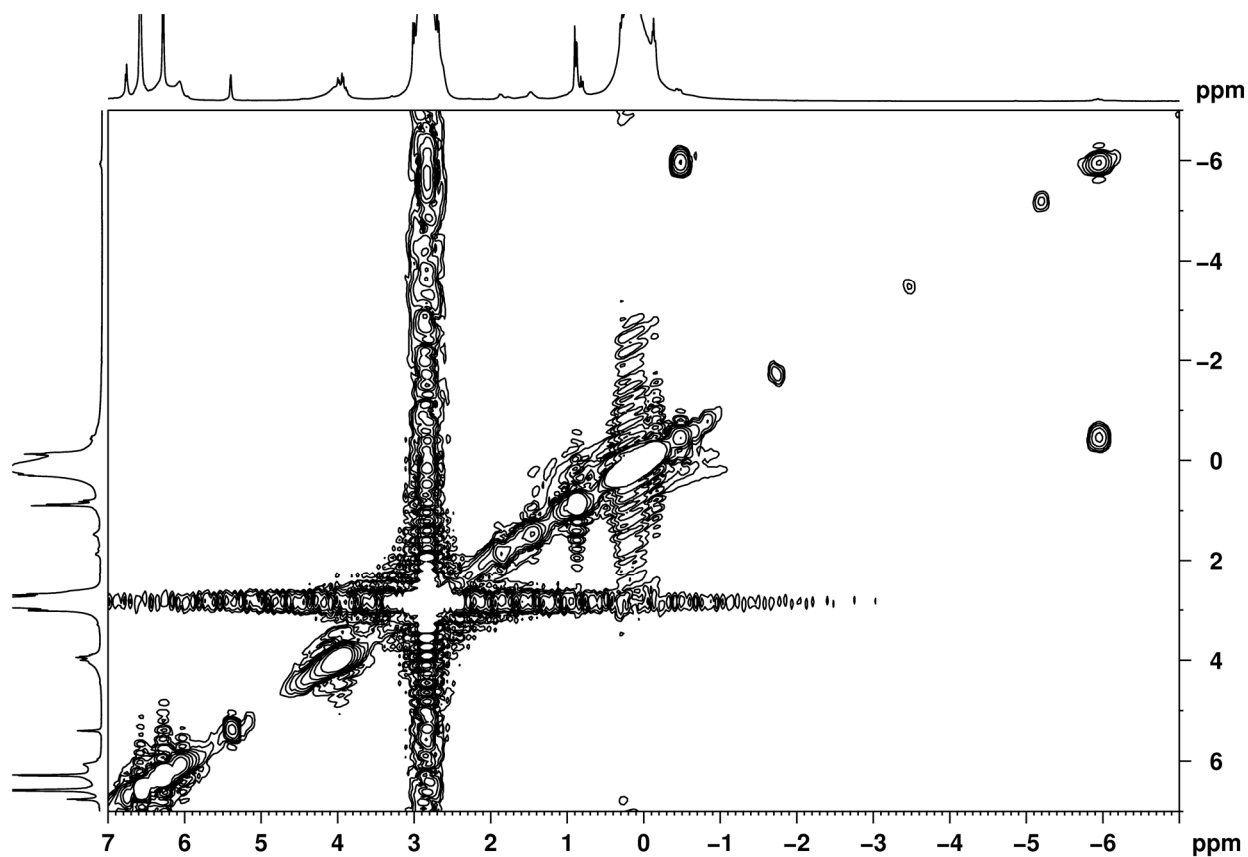

**Figure S21.**  $^1\text{H}$  of system  $[\text{Cp}_2\text{ZrH}_2]_2 - \text{MMAO-12}$  (1:7) in  $\text{CD}_2\text{Cl}_2$  ( $T = 296.3 \text{ K}$ ).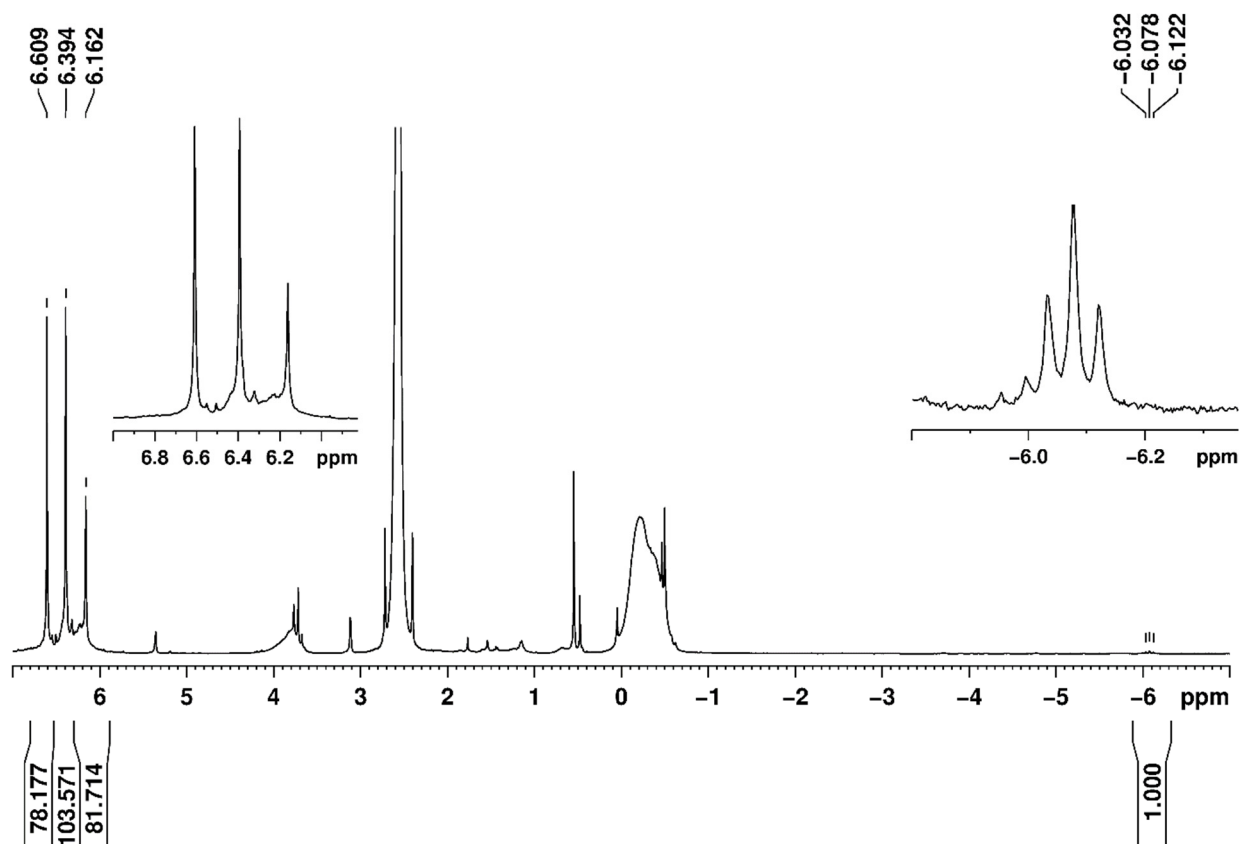**Figure S22.**  $^{13}\text{C}$  NMR of system  $[\text{Cp}_2\text{ZrH}_2]_2 - \text{MMAO-12}$  (1:7) in  $\text{CD}_2\text{Cl}_2$  ( $T = 296.6 \text{ K}$ ).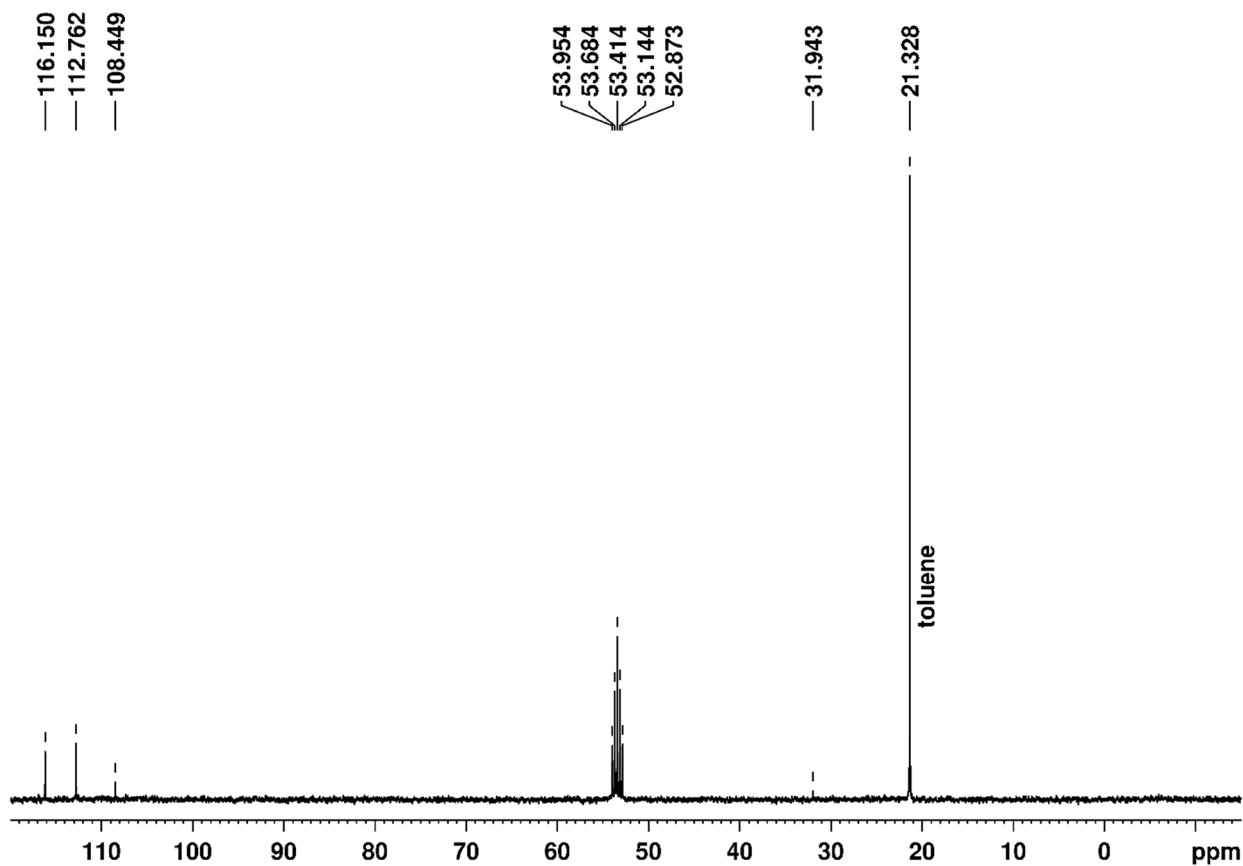

**Figure S23.** COSY HH of system  $[\text{Cp}_2\text{ZrH}_2]_2$  – MMAO-12 (1:7) in  $\text{CD}_2\text{Cl}_2$  (T= 296 K)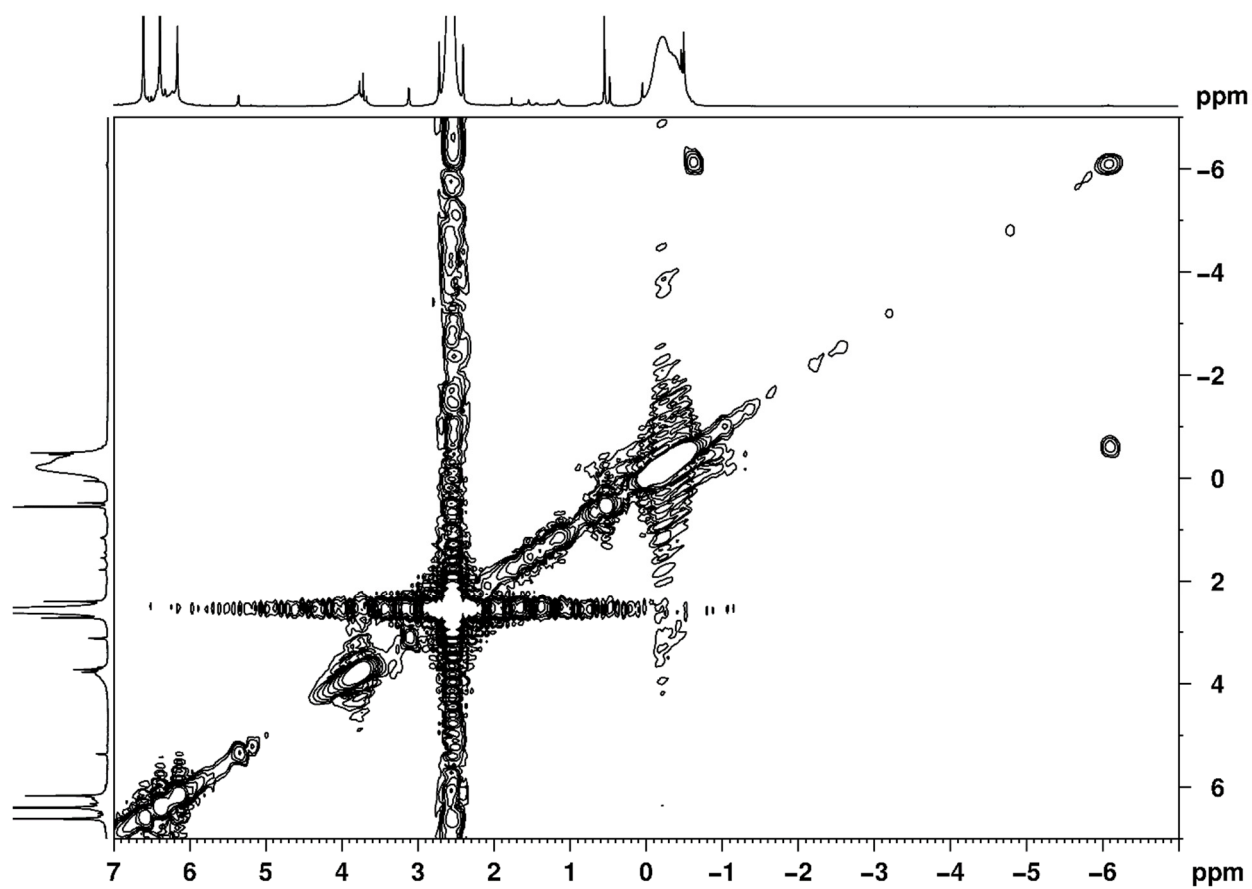

**Figure S24.**  $^1\text{H}$  NMR of dimer **5** obtained in the system  $\text{Cp}_2\text{ZrCl}_2\text{--HAIBu}^i_2\text{--MMAO-12}$ ,  $[\text{Zr}]:[\text{Al}]:[\text{MMAO-12}]:[1\text{-alkene}]=1:4:8:1$  in  $\text{CDCl}_3$  ( $T=298.7\text{ K}$ ), 20 min.

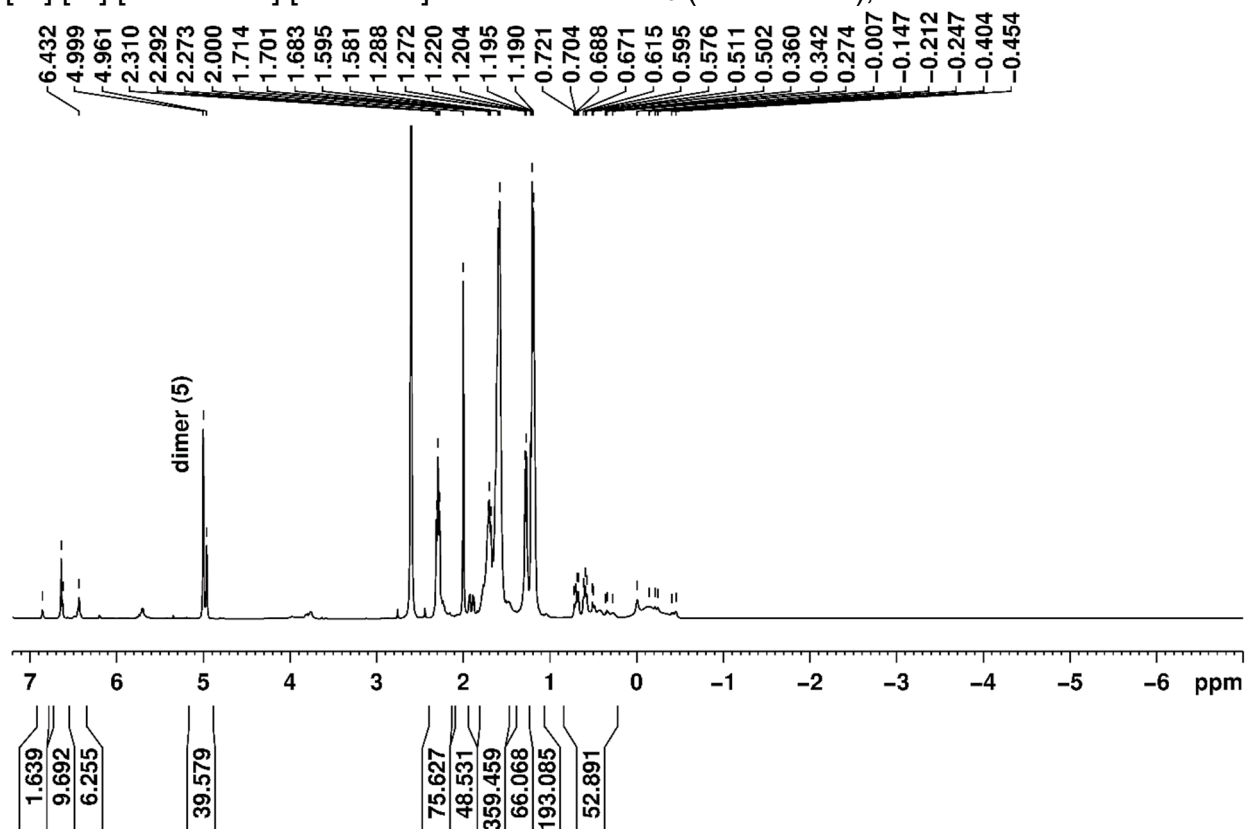

**Figure S25.**  $^{13}\text{C}$  NMR of dimer **5** obtained in the system  $\text{Cp}_2\text{ZrCl}_2\text{--HAIBu}^i_2\text{--MMAO-12}$ ,  $[\text{Zr}]:[\text{Al}]:[\text{MMAO-12}]:[1\text{-alkene}]=1:4:8:1$  in  $\text{CDCl}_3$  ( $T=298.7\text{ K}$ ), 20 min.

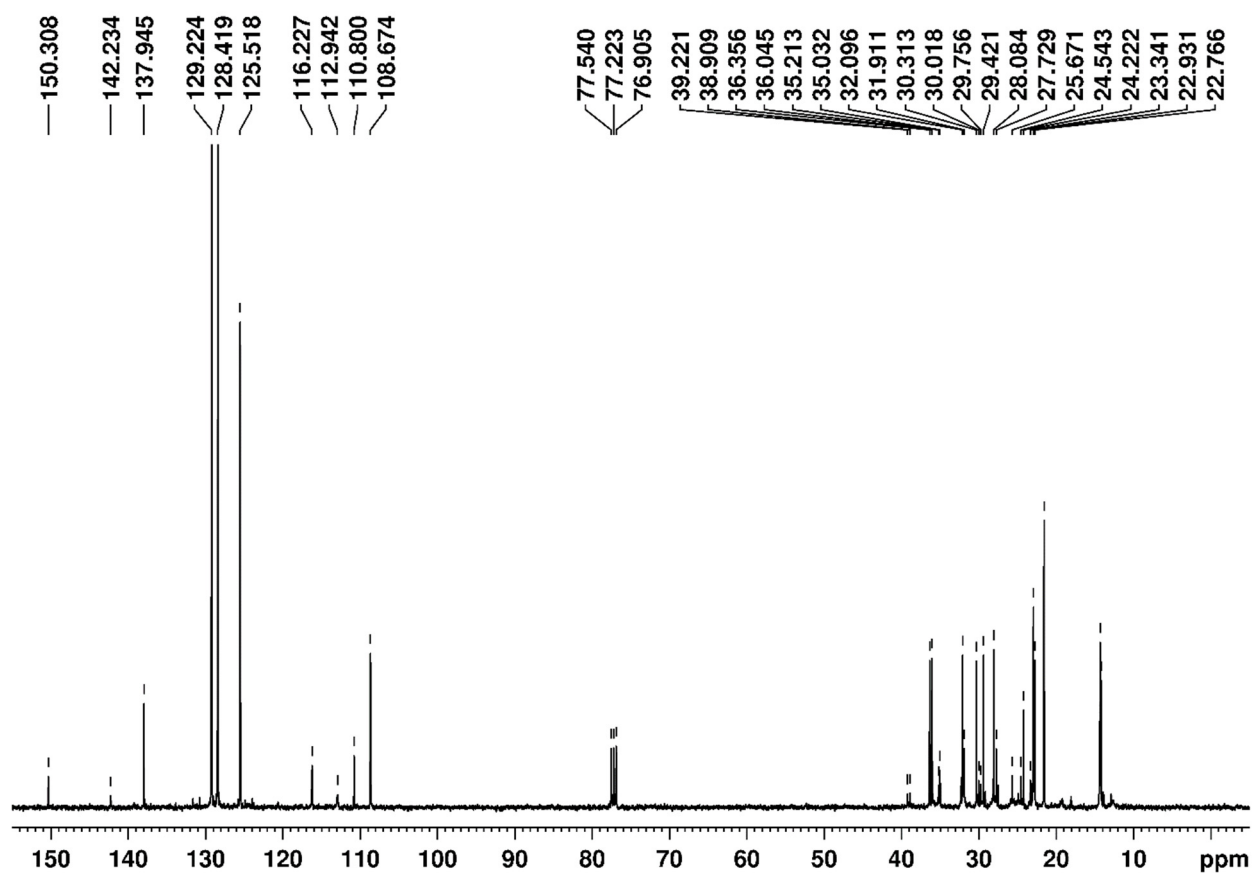

**Figure S26.**  $^1\text{H}$  NMR of tetramers **7** obtained in the system  $\text{Cp}_2\text{ZrCl}_2\text{--HAIBu}^i_2\text{--}(\text{Ph}_3\text{C})[\text{B}(\text{C}_6\text{F}_5)_4]$ ,  $[\text{Zr}]:[\text{Al}]:[\text{B}]:[1\text{-alkene}] = 4:16:1:1000$ ,  $\text{CHCl}_3$ ,  $40^\circ\text{C}$ , 16 h.

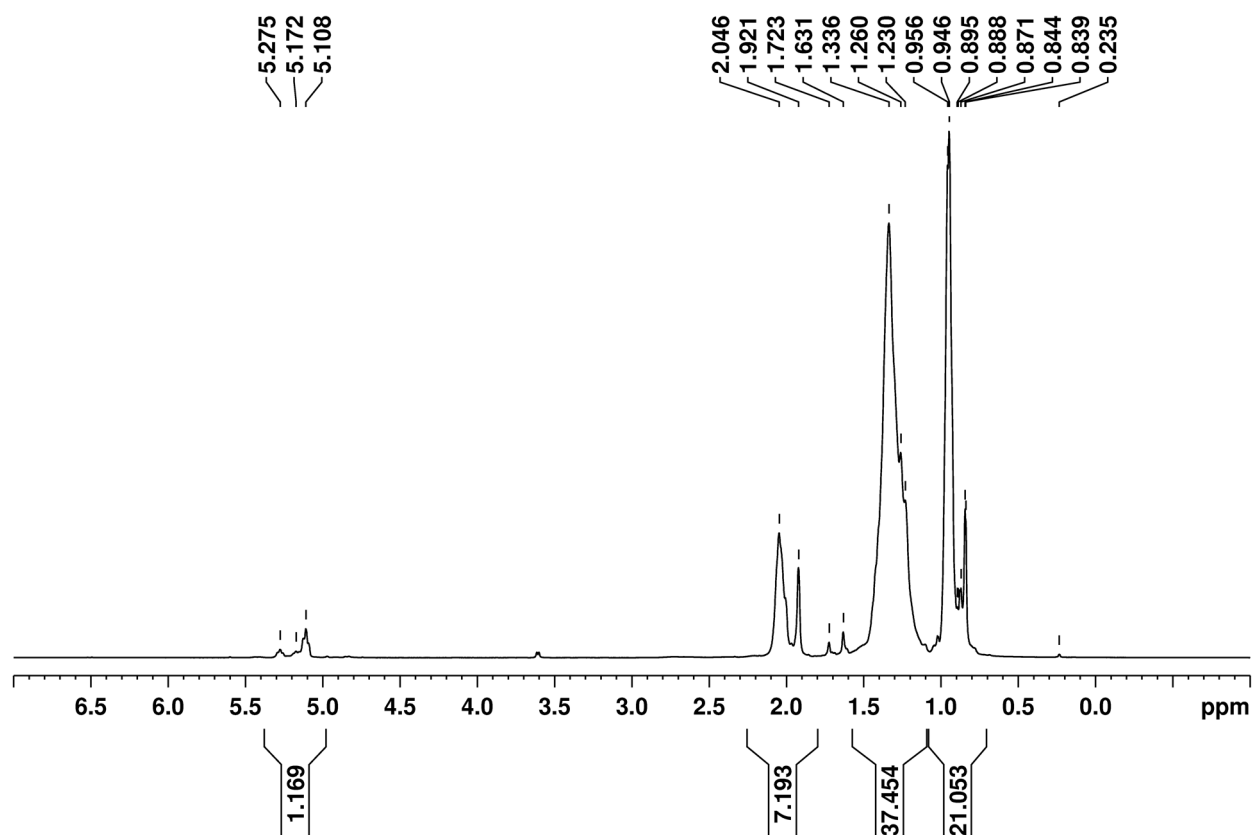



**Figure S27.**  $^{13}\text{C}$  NMR of tetramers **7** obtained in the system  $\text{Cp}_2\text{ZrCl}_2\text{--HAIBu}^i_2\text{--}(\text{Ph}_3\text{C})[\text{B}(\text{C}_6\text{F}_5)_4]$ ,  $[\text{Zr}]:[\text{Al}]:[\text{B}]:[1\text{-alkene}] = 4:16:1:1000$ ,  $\text{CHCl}_3$ ,  $40^\circ\text{C}$ , 16 h.

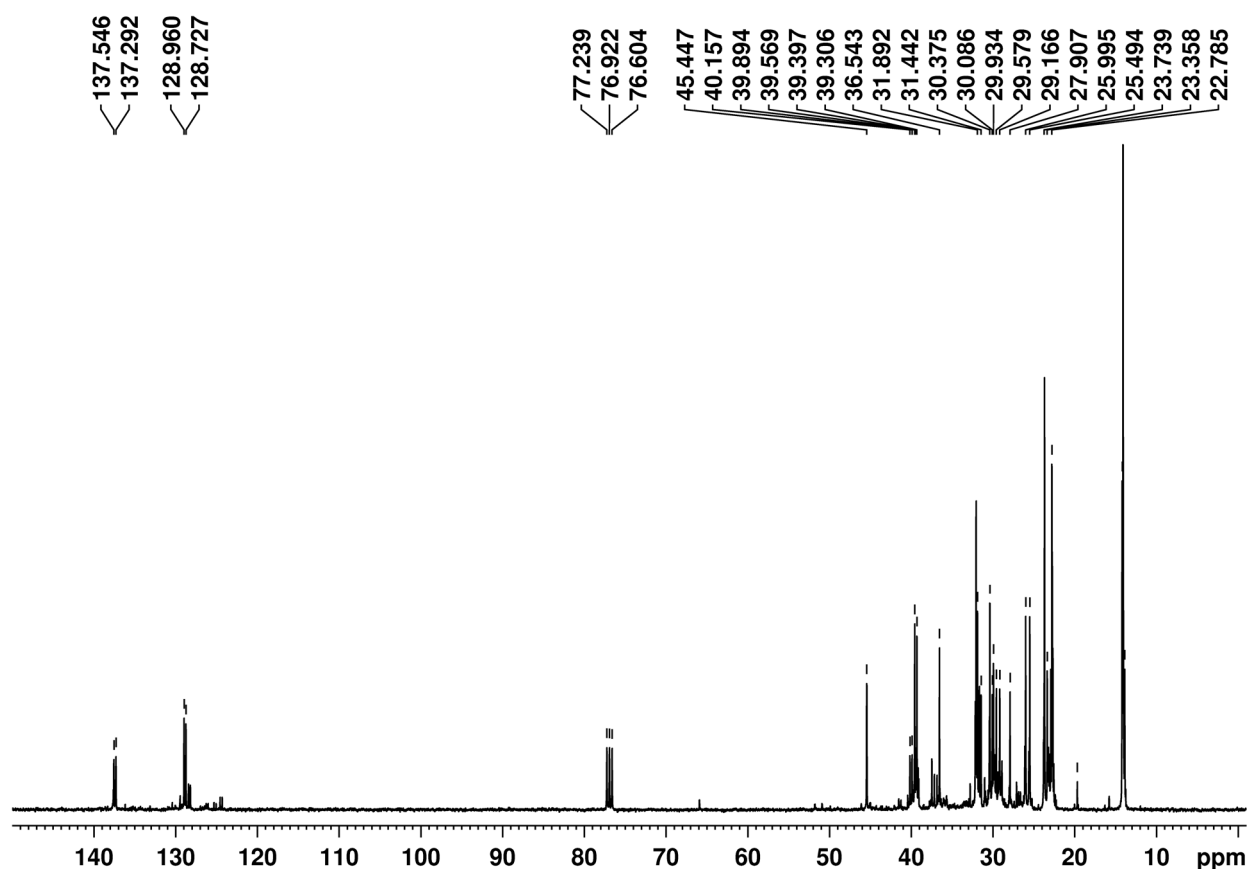

### GC-MS analysis of products

Before each series of mass spectral analysis, calibration was performed using 1-hexene – dimer – tetramer mixtures with various mass fractions to determine response factors (RF). Response factors of dimers or tetramers were calculated as  $\text{RF}(\text{dimer or tetramer}) = \text{Slope}(1\text{-hexene}) / \text{Slope}(\text{dimer or tetramer})$ , where  $\text{Slope}(1\text{-hexene})$  was found from the dependence Peak area (1-hexene) – Concentration (1-hexene), and  $\text{Slope}(\text{dimer or tetramer})$  from the dependence Peak area (dimer or tetramer) – Concentration (dimer or tetramer). 1-Hexene was used as a standard with  $\text{RF}=1$ . RFs were found for dimer and tetramer as 1.1 and 1.2, correspondingly. Thus, product composition was determined via peak areas multiplied by response factors.

**Figure S28.** Example of GC-MS analysis of dimers and oligomers obtained in the system  $[\text{Cp}_2\text{ZrH}_2]_2\text{-ClAlBu}_i\text{-MMAO-12}$ ,  $[\text{Zr}]:[\text{Al}]:[\text{MMAO-12}]:[1\text{-alkene}] = 1:3:30:1000$ ,  $\text{CH}_2\text{Cl}_2$ ,  $40^\circ\text{C}$ , 16 h.

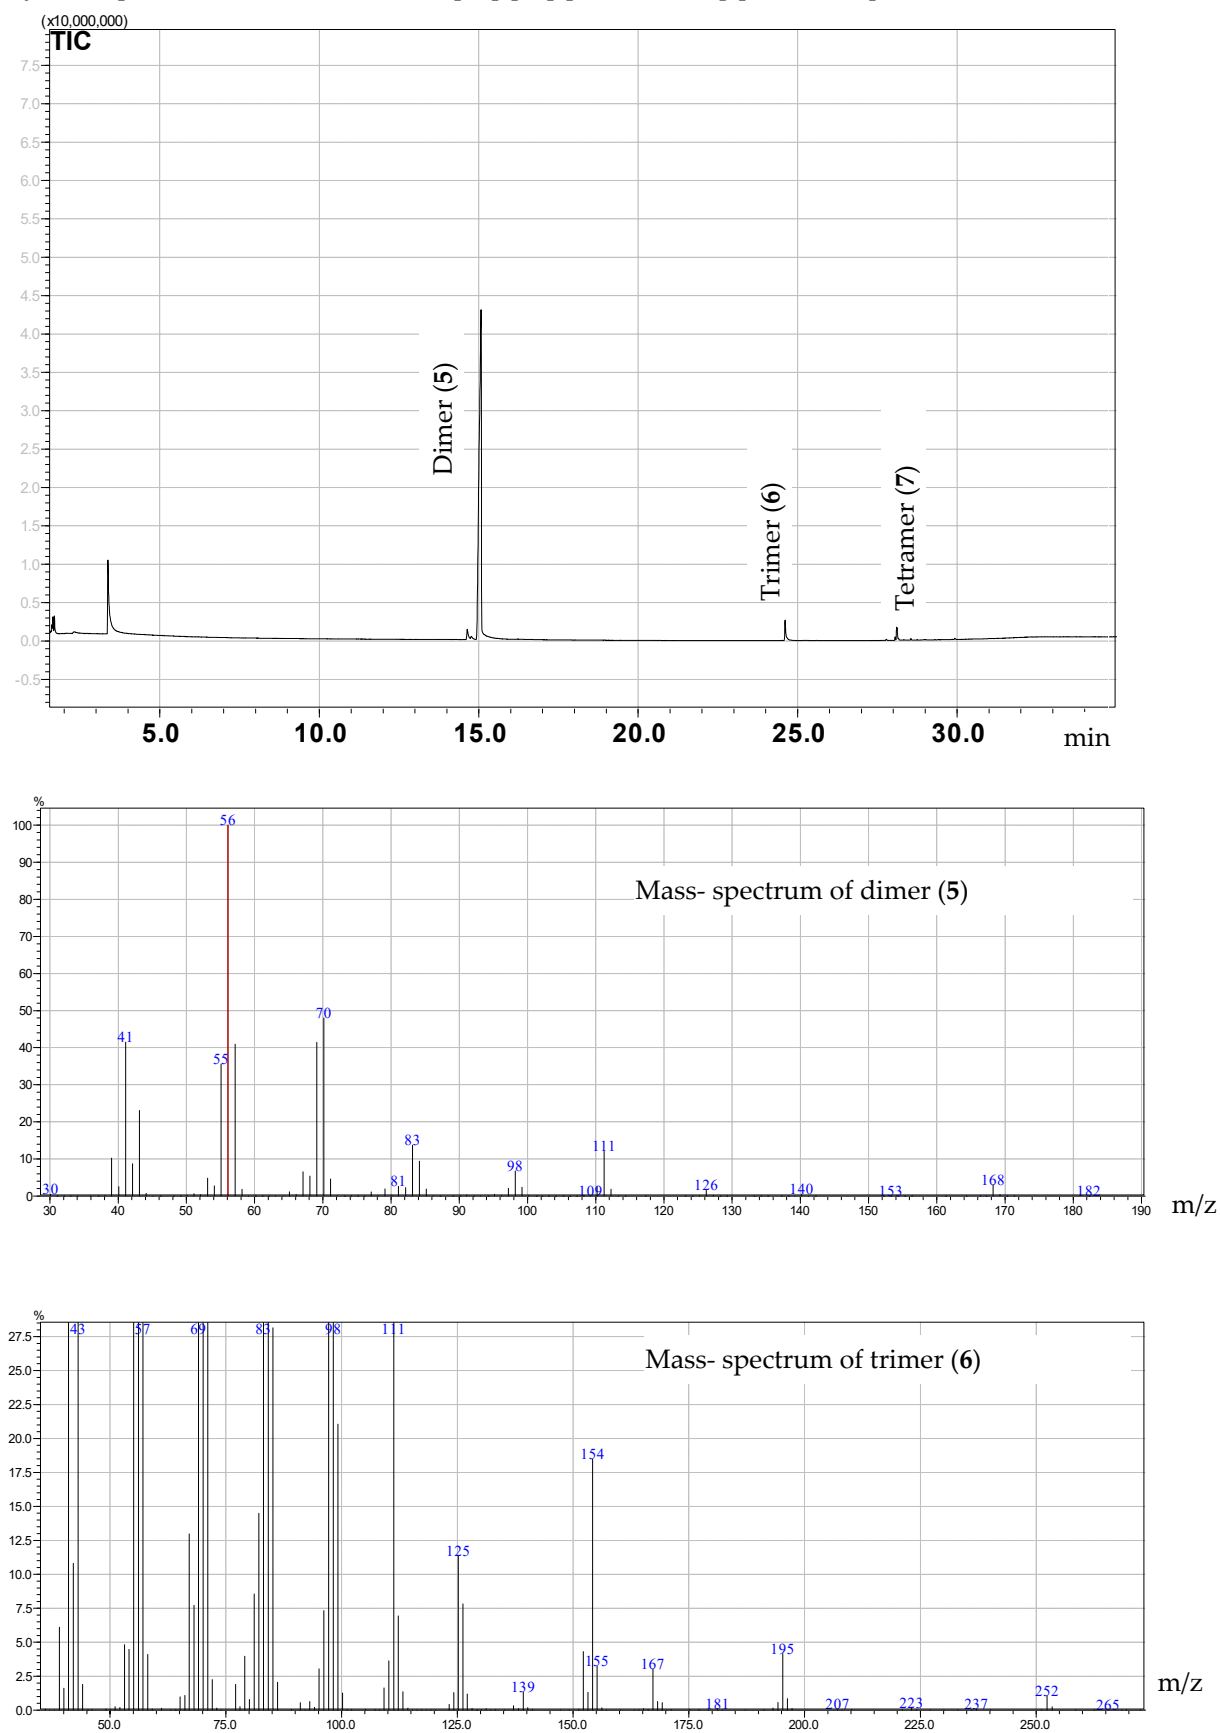

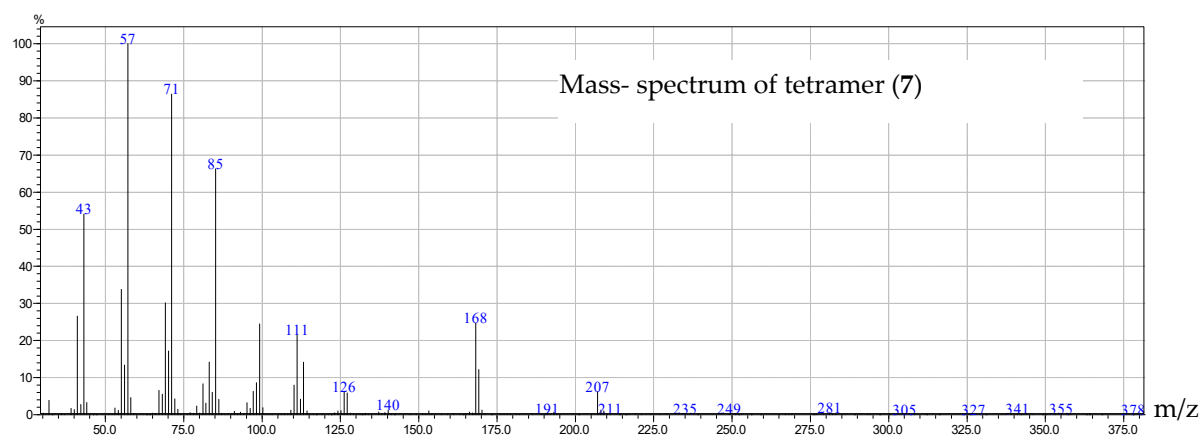

**Figure S29.** Example of GC-MS analysis of dimers and oligomers obtained in the system  $\text{Cp}_2\text{ZrCl}_2\text{--HAIBu}^i_2\text{--(Ph}_3\text{C)[B(C}_6\text{F}_5)_4]$ ,  $[\text{Zr}]:[\text{Al}]:[\text{B}]:[1\text{-alkene}] = 4:16:1:1000$ ,  $\text{CHCl}_3$ ,  $40^\circ\text{C}$ , 16 h.

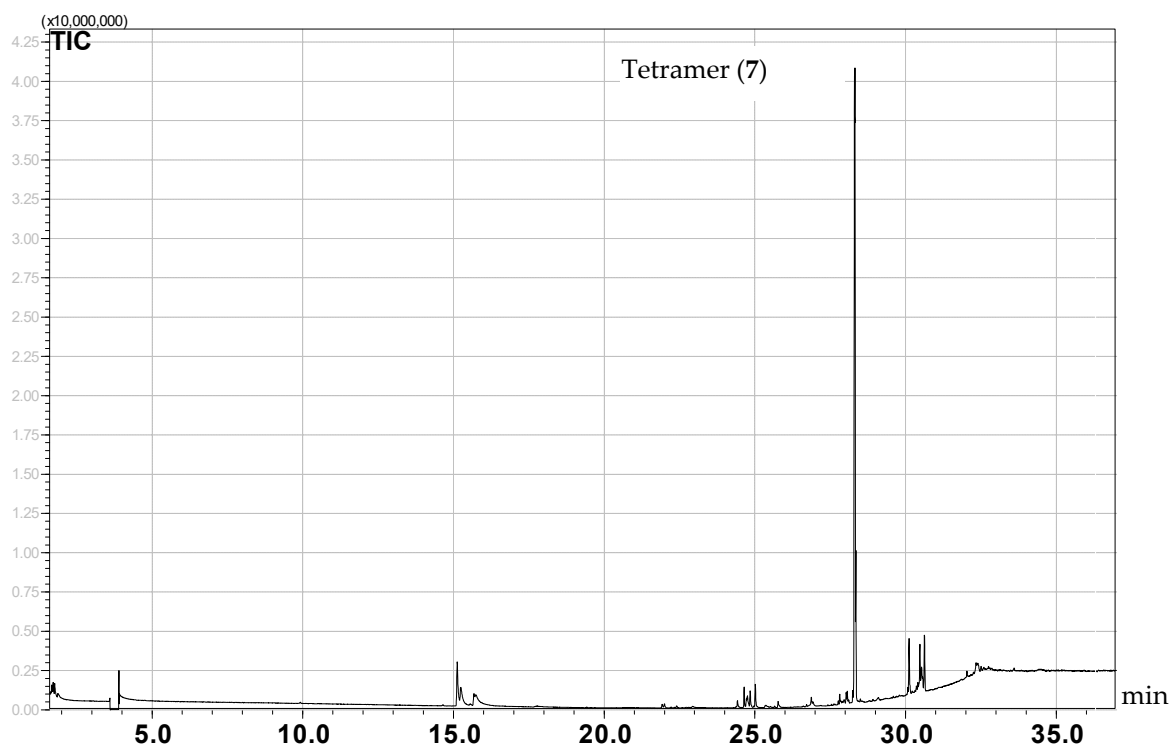

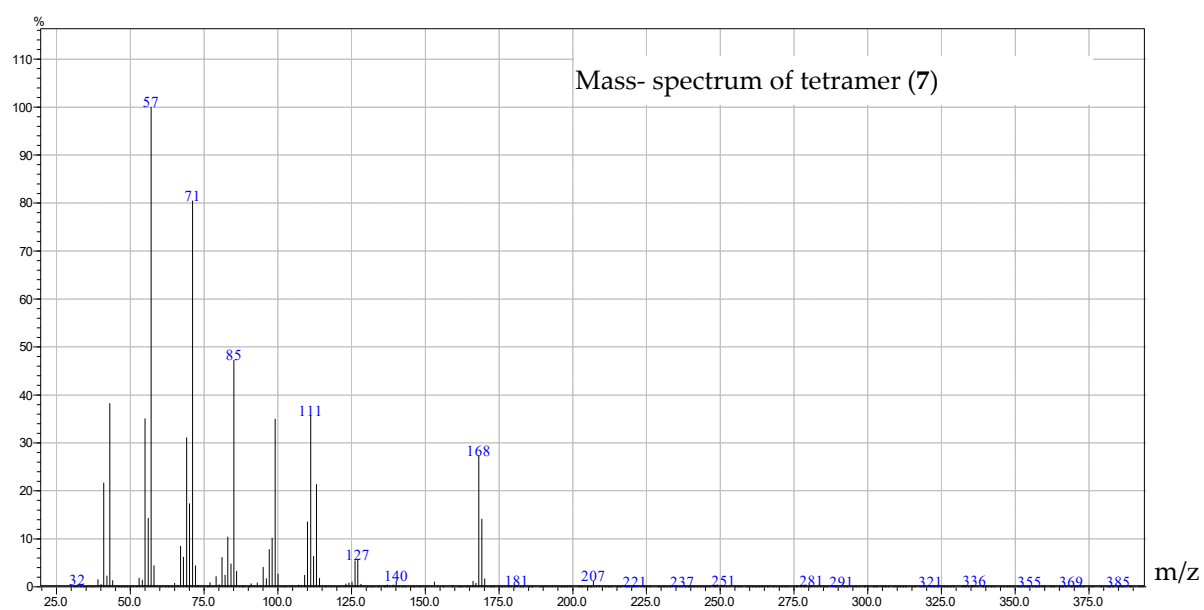

**Table S1.** The energy at 0K, the ZPVE correction, the enthalpy, the Gibbs free energy in gas, the temperature multiplied by the entropy for complexes **9a-e**, calculated at PBE/3 $\zeta$  level (298.15 K).

| Complex   | E, Hartree    | ZPVE, Hartree | H, kcal/mol | G, kcal/mol | T*S, cal/mol |
|-----------|---------------|---------------|-------------|-------------|--------------|
| <b>9a</b> | -9177.483313  | 0.479046      | -5758635.6  | -5758702.0  | 66417.6      |
| <b>9b</b> | -9177.470210  | 0.478892      | -5758627.4  | -5758692.4  | 65081.6      |
| <b>9c</b> | -9177.480291  | 0.479422      | -5758633.2  | -5758698.7  | 65459.5      |
| <b>9d</b> | -9177.461167  | 0.480010      | -5758621.2  | -5758685.2  | 63942.4      |
| <b>9e</b> | -10038.215279 | 0.607638      | -6298665.2  | -6298747.2  | 81996.9      |

**Table S2.** Relative thermodynamic parameters of isomeric complexes **9a-d**, calculated at PBE0/def2TZVP level (298.15 K).

| Complex   | $\Delta E$ , Hartree | $\Delta E_{ZPVE}$ , Hartree | $\Delta H$ , kcal/mol | $\Delta G$ , kcal/mol | T $\Delta S$ , cal/mol |
|-----------|----------------------|-----------------------------|-----------------------|-----------------------|------------------------|
| <b>9a</b> | 0.001420             | 0.000052                    | 0.0                   | 0.0                   | 2362.8                 |
| <b>9b</b> | 0.011620             | 0.010971                    | 6.8                   | 8.4                   | 796.1                  |
| <b>9c</b> | 0.000000             | 0.000000                    | 0.0                   | 1.2                   | 1132.1                 |
| <b>9d</b> | 0.020137             | 0.020704                    | 12.7                  | 15.1                  | 0.0                    |

**Table S3.** Relative thermodynamic parameters of isomeric complexes **9a-d**, calculated at PBE0-GD3/def2TZVP level (298.15 K).

| Complex   | $\Delta E$ , Hartree | $\Delta E_{ZPVE}$ , Hartree | $\Delta H$ , kcal/mol | $\Delta G$ , kcal/mol | T $\Delta S$ , cal/mol |
|-----------|----------------------|-----------------------------|-----------------------|-----------------------|------------------------|
| <b>9a</b> | 0.001174             | 0.000050                    | 0.0                   | 0.0                   | 941.6                  |
| <b>9b</b> | 0.010265             | 0.009999                    | 6.3                   | 6.5                   | 686.6                  |
| <b>9c</b> | 0.000000             | 0.000000                    | 0.1                   | 0.2                   | 898.6                  |
| <b>9d</b> | 0.020161             | 0.020487                    | 12.8                  | 13.7                  | 0.0                    |

**Table S4.** Relative thermodynamic parameters isomeric complexes **9a-d** in CHCl<sub>3</sub> solution, calculated at PBE0/def2TZVP level (298.15 K).

| Complex   | $\Delta E$ , Hartree | $\Delta E_{ZPVE}$ , Hartree | $\Delta H$ , kcal/mol | $\Delta G$ , kcal/mol | T $\Delta S$ , cal/mol |
|-----------|----------------------|-----------------------------|-----------------------|-----------------------|------------------------|
| <b>9a</b> | 0.000000             | 0.000000                    | 0.0                   | 0.0                   | 2322.0                 |
| <b>9b</b> | 0.004409             | 0.005690                    | 3.6                   | 4.8                   | 1062.3                 |
| <b>9c</b> | 0.002469             | 0.002932                    | 2.1                   | 2.3                   | 2049.2                 |
| <b>9d</b> | 0.021519             | 0.023216                    | 14.3                  | 16.6                  | 0.0                    |

**Table S5.** Relative thermodynamic parameters of isomeric complexes **9a-d** in CH<sub>2</sub>Cl<sub>2</sub> solution, calculated at PBE0/def2TZVP level (298.15 K).

| Complex   | $\Delta E$ , Hartree | $\Delta E_{ZPVE}$ , Hartree | $\Delta H$ , kcal/mol | $\Delta G$ , kcal/mol | T $\Delta S$ , cal/mol |
|-----------|----------------------|-----------------------------|-----------------------|-----------------------|------------------------|
| <b>9a</b> | 0.000000             | 0.000000                    | 0.0                   | 0.0                   | 2337.8                 |
| <b>9b</b> | 0.002884             | 0.004539                    | 2.8                   | 4.2                   | 906.4                  |
| <b>9c</b> | 0.003194             | 0.003504                    | 2.5                   | 2.6                   | 2158.6                 |

---

|           |          |          |      |      |     |
|-----------|----------|----------|------|------|-----|
| <b>9d</b> | 0.022043 | 0.023679 | 14.6 | 17.0 | 0.0 |
|-----------|----------|----------|------|------|-----|

Atomic coordinates of the complexes **9a-e****9a**

|    |              |              |              |
|----|--------------|--------------|--------------|
| C  | 3.579096680  | -1.182145120 | 2.772116080  |
| C  | 2.692045280  | -0.086220410 | 2.960824760  |
| C  | 3.172921060  | 1.011578820  | 2.194632780  |
| C  | 4.590397310  | -0.764442430 | 1.865318010  |
| C  | 4.338653910  | 0.593690410  | 1.508025440  |
| H  | 3.513442520  | -2.147786050 | 3.258561900  |
| H  | 1.811129990  | -0.092078430 | 3.595230600  |
| H  | 2.712778870  | 1.990377220  | 2.127821760  |
| H  | 5.432051580  | -1.365961360 | 1.539545320  |
| H  | 4.950478160  | 1.204947060  | 0.851304440  |
| Zr | 2.462548190  | -0.792445320 | 0.540541630  |
| C  | 4.139309800  | -1.673368520 | -1.095318320 |
| C  | 3.068528890  | -2.607475830 | -1.100619470 |
| C  | 1.930701140  | -1.951407000 | -1.649648020 |
| C  | 3.662198400  | -0.442176090 | -1.635319280 |
| C  | 2.298908610  | -0.626303840 | -1.991142190 |
| H  | 5.155272930  | -1.873424780 | -0.772142620 |
| H  | 3.116113600  | -3.642189800 | -0.782739350 |
| H  | 0.943935190  | -2.385835160 | -1.769440610 |
| H  | 4.257567880  | 0.450215750  | -1.802894530 |
| H  | 1.631910700  | 0.114671980  | -2.416832500 |
| Zr | 0.111573650  | 2.615502270  | -0.003216450 |
| H  | 1.198262360  | 0.846776720  | 0.248584470  |
| C  | -0.430856440 | 1.923371560  | 2.382266270  |
| C  | 0.181485240  | 3.203883800  | 2.437103460  |
| C  | -0.701726880 | 4.133904760  | 1.812510580  |
| C  | -1.670094420 | 2.057116370  | 1.707607220  |
| C  | -1.847457190 | 3.425843890  | 1.359338570  |
| H  | -0.023583150 | 0.991215290  | 2.756498100  |
| H  | 1.120841600  | 3.449678460  | 2.923135770  |
| H  | -0.543793250 | 5.204137880  | 1.732225500  |
| H  | -2.360003790 | 1.250456950  | 1.483885180  |
| H  | -2.717353220 | 3.852942090  | 0.874816760  |
| C  | 1.488323490  | 3.061391500  | -2.079418210 |
| C  | 2.420674990  | 3.007018930  | -1.006043320 |
| C  | 2.156111090  | 4.092703050  | -0.136521610 |
| C  | 0.659096420  | 4.201474080  | -1.890339800 |
| C  | 1.064639800  | 4.831501140  | -0.682535970 |
| H  | 1.422992680  | 2.366278930  | -2.910712220 |

---

|    |              |              |              |
|----|--------------|--------------|--------------|
| H  | 3.184997340  | 2.251901720  | -0.864975020 |
| H  | 2.702929040  | 4.336398020  | 0.769474130  |
| H  | -0.118847430 | 4.544174980  | -2.561736180 |
| H  | 0.641724300  | 5.743131690  | -0.274502250 |
| H  | 2.333515050  | -2.492526630 | 1.206988070  |
| H  | -1.319248370 | 3.189002650  | -0.991650570 |
| Al | -1.822177370 | -1.319379280 | -0.393980680 |
| C  | -3.516230950 | -1.038975000 | 0.618643650  |
| H  | -3.913997300 | -2.055846740 | 0.793019620  |
| H  | -3.325191050 | -0.640108140 | 1.628490840  |
| C  | -4.587644550 | -0.193351680 | -0.097418660 |
| H  | -4.854604110 | -0.621888330 | -1.075550840 |
| C  | -1.775467240 | -2.778490710 | -1.751039880 |
| H  | -2.758421650 | -2.737460640 | -2.255608520 |
| H  | -1.045028300 | -2.564967900 | -2.548683080 |
| C  | -1.553120880 | -4.196539430 | -1.189281290 |
| H  | -2.319615410 | -4.462596020 | -0.445331180 |
| H  | -1.586663380 | -4.968124690 | -1.975392870 |
| H  | -0.580929420 | -4.286745600 | -0.681262100 |
| H  | -4.236751930 | 0.831486800  | -0.292381350 |
| H  | -5.519448880 | -0.117079440 | 0.485913200  |
| Cl | -0.145739730 | -1.590898090 | 1.157978190  |
| Cl | -1.161426150 | 0.603831900  | -1.467065940 |

**9b**

|    |             |              |              |
|----|-------------|--------------|--------------|
| C  | 3.266959420 | -1.002395970 | 3.084015740  |
| C  | 2.587509850 | 0.232156330  | 2.973660540  |
| C  | 3.338791260 | 1.066695630  | 2.090939860  |
| C  | 4.407401560 | -0.960629800 | 2.242415530  |
| C  | 4.462717720 | 0.334401370  | 1.647112290  |
| H  | 2.935292050 | -1.861456170 | 3.654725850  |
| H  | 1.679023630 | 0.503046940  | 3.501396750  |
| H  | 3.103071630 | 2.087905120  | 1.818190020  |
| H  | 5.122251750 | -1.765793730 | 2.102229640  |
| H  | 5.235494190 | 0.699934770  | 0.977702220  |
| Zr | 2.435628620 | -0.849392570 | 0.634973800  |
| C  | 4.298237650 | -1.300719400 | -1.030216340 |
| C  | 3.470728160 | -2.449762200 | -1.061700900 |
| C  | 2.214337580 | -2.070553090 | -1.602420490 |
| C  | 3.550352470 | -0.203212160 | -1.540685340 |
| C  | 2.262969190 | -0.686639600 | -1.903305750 |
| H  | 5.328292410 | -1.268339740 | -0.689261140 |



---

|    |              |              |              |
|----|--------------|--------------|--------------|
| H  | 3.730449780  | -3.438509220 | -0.700764880 |
| H  | 1.355264680  | -2.720363550 | -1.724633310 |
| H  | 3.918097550  | 0.808612270  | -1.671165890 |
| H  | 1.447993420  | -0.103635470 | -2.319094840 |
| Zr | 0.092466200  | 2.630544300  | -0.157089440 |
| H  | 1.400333140  | 0.990403480  | 0.269793950  |
| C  | -0.537606710 | 1.894459480  | 2.200754610  |
| C  | 0.362138450  | 2.988213050  | 2.330558530  |
| C  | -0.293709810 | 4.150521280  | 1.837380160  |
| C  | -1.734612630 | 2.378917870  | 1.617166270  |
| C  | -1.583681370 | 3.771801810  | 1.390772500  |
| H  | -0.344344560 | 0.863738240  | 2.478488930  |
| H  | 1.354546680  | 2.957321640  | 2.766819510  |
| H  | 0.114916040  | 5.155978190  | 1.819981360  |
| H  | -2.599869750 | 1.783585700  | 1.348781350  |
| H  | -2.316845490 | 4.418928220  | 0.922574990  |
| C  | 1.784058440  | 2.901648270  | -2.087019470 |
| C  | 2.511408360  | 3.118330030  | -0.877232390 |
| C  | 2.024020600  | 4.302268290  | -0.279339080 |
| C  | 0.867735450  | 3.967881460  | -2.236862510 |
| C  | 0.985641570  | 4.819373670  | -1.109517420 |
| H  | 1.932434350  | 2.091473910  | -2.793406700 |
| H  | 3.308002730  | 2.497435100  | -0.486640010 |
| H  | 2.384139790  | 4.741770430  | 0.645951390  |
| H  | 0.146752890  | 4.077840960  | -3.037714860 |
| H  | 0.403671780  | 5.718193610  | -0.929601710 |
| Al | -1.000600370 | -0.751704690 | -0.262100140 |
| C  | -2.449246580 | -1.027123030 | 1.086687180  |
| H  | -2.355833960 | -2.087580370 | 1.383518030  |
| H  | -2.289499740 | -0.463510310 | 2.019227010  |
| C  | -3.870705580 | -0.772596950 | 0.545665490  |
| H  | -4.078140210 | -1.380649170 | -0.347717770 |
| C  | -1.257218310 | -1.713885360 | -1.994721740 |
| H  | -2.130258870 | -1.221364440 | -2.460044320 |
| H  | -0.434624740 | -1.551509520 | -2.708704120 |
| C  | -1.543779770 | -3.221639010 | -1.844013400 |
| H  | -2.415533400 | -3.404452580 | -1.197900910 |
| H  | -1.753259530 | -3.705878470 | -2.811657020 |
| H  | -0.701221540 | -3.761698630 | -1.384450760 |
| H  | -4.018965800 | 0.276312900  | 0.244693700  |
| H  | -4.649644010 | -1.012860610 | 1.287296930  |
| H  | 0.453452120  | -1.011227640 | 0.585168260  |

---

|    |              |              |              |
|----|--------------|--------------|--------------|
| H  | -0.614857110 | 0.849874560  | -0.692421670 |
| Cl | -1.960871720 | 2.959401590  | -1.623916490 |
| Cl | 1.774391860  | -3.154065270 | 1.486592000  |

**9c**

|    |              |              |              |
|----|--------------|--------------|--------------|
| C  | 1.955884260  | -2.435907860 | 1.283024320  |
| C  | 1.939686710  | -1.309157740 | 2.132779030  |
| C  | 3.213285760  | -0.679038880 | 2.045135630  |
| C  | 3.256805420  | -2.542286060 | 0.706967450  |
| C  | 4.035219070  | -1.473874390 | 1.195919030  |
| H  | 1.126879300  | -3.114283010 | 1.109592410  |
| H  | 1.101789480  | -0.981130650 | 2.734467350  |
| H  | 3.536409250  | 0.203175410  | 2.589958260  |
| H  | 3.579422690  | -3.316170710 | 0.017158420  |
| H  | 5.073648400  | -1.271539000 | 0.957708200  |
| Zr | 2.138212940  | -0.341510100 | -0.273776410 |
| C  | 4.280776990  | -0.990240250 | -1.827475390 |
| C  | 3.117699910  | -1.018482900 | -2.630722400 |
| C  | 2.608843830  | 0.310269570  | -2.723541500 |
| C  | 4.456360530  | 0.331770410  | -1.358009590 |
| C  | 3.433724720  | 1.142961420  | -1.934508350 |
| H  | 4.892461680  | -1.847609010 | -1.568797140 |
| H  | 2.699561200  | -1.891740720 | -3.122864080 |
| H  | 1.732298090  | 0.609911930  | -3.288166980 |
| H  | 5.251470460  | 0.687658160  | -0.709137260 |
| H  | 3.328347570  | 2.212132740  | -1.795964130 |
| Zr | 0.184707130  | 2.116141470  | 0.461459830  |
| H  | 2.091634580  | 1.492611190  | 0.544371710  |
| C  | 0.694260520  | 1.828025700  | 2.969235190  |
| C  | 0.590243470  | 3.243172800  | 2.820668270  |
| C  | -0.766269520 | 3.557021650  | 2.571800420  |
| C  | -0.590345360 | 1.273123930  | 2.771074170  |
| C  | -1.488797590 | 2.344656600  | 2.493516010  |
| H  | 1.601281240  | 1.286959560  | 3.210855580  |
| H  | 1.408465150  | 3.949395760  | 2.928714830  |
| H  | -1.173056200 | 4.548784570  | 2.406468860  |
| H  | -0.857718420 | 0.222766630  | 2.812166650  |
| H  | -2.550318910 | 2.242804600  | 2.288130860  |
| C  | 0.743191650  | 3.311708990  | -1.783534890 |
| C  | 1.470975080  | 3.984984480  | -0.760968430 |
| C  | 0.536968520  | 4.709560180  | 0.033979610  |
| C  | -0.629453610 | 3.558455990  | -1.569235190 |

|    |              |              |              |
|----|--------------|--------------|--------------|
| C  | -0.757941730 | 4.429088550  | -0.445729000 |
| H  | 1.160700310  | 2.708232360  | -2.579149760 |
| H  | 2.550885070  | 4.016107150  | -0.649276940 |
| H  | 0.788152280  | 5.348202870  | 0.873547200  |
| H  | -1.446180560 | 3.167023220  | -2.166869980 |
| H  | -1.693483380 | 4.807131350  | -0.045051330 |
| Al | -1.932656930 | -1.427888800 | -0.570454440 |
| H  | 0.535590600  | 0.170037730  | 0.757732710  |
| C  | -3.201583660 | -1.926850960 | -2.010666620 |
| H  | -4.193140120 | -1.520013100 | -1.744679710 |
| H  | -2.908638240 | -1.405687870 | -2.937190650 |
| C  | -3.314042350 | -3.442368630 | -2.270364540 |
| H  | -3.638991650 | -3.987298270 | -1.370685890 |
| C  | -2.033332540 | -2.203806950 | 1.253121820  |
| H  | -1.913731760 | -3.297047900 | 1.146222330  |
| H  | -1.174853960 | -1.875861850 | 1.860828510  |
| C  | -3.352055150 | -1.901877570 | 1.992433940  |
| H  | -4.225262240 | -2.259636610 | 1.425889250  |
| H  | -3.394919510 | -2.377858680 | 2.985149100  |
| H  | -3.495053020 | -0.821052660 | 2.144076100  |
| H  | -2.348913810 | -3.875186010 | -2.574845020 |
| H  | -4.037972040 | -3.676054750 | -3.067322290 |
| H  | 0.863815650  | 1.001652410  | -1.005008800 |
| Cl | 0.176692580  | -1.792489120 | -1.440712820 |
| Cl | -2.039213920 | 0.879305830  | -0.466328200 |

**9d**

|    |             |              |              |
|----|-------------|--------------|--------------|
| C  | 2.074018750 | -2.321192560 | 1.452944550  |
| C  | 2.108529230 | -1.094481620 | 2.166423580  |
| C  | 3.411330360 | -0.552685020 | 2.049592900  |
| C  | 3.368721440 | -2.547207280 | 0.918468400  |
| C  | 4.193596820 | -1.450912360 | 1.278909730  |
| H  | 1.220334600 | -2.983965860 | 1.367179210  |
| H  | 1.282944760 | -0.665646600 | 2.714415560  |
| H  | 3.764436180 | 0.383505450  | 2.468795230  |
| H  | 3.665541260 | -3.415031810 | 0.340107040  |
| H  | 5.240586140 | -1.317112710 | 1.028166870  |
| Zr | 2.431852200 | -0.515144780 | -0.353428080 |
| C  | 4.414490910 | -1.659887300 | -1.689979290 |
| C  | 3.200605070 | -2.113719040 | -2.262301770 |
| C  | 2.584873140 | -1.004221990 | -2.911624820 |
| C  | 4.510488820 | -0.264709340 | -1.904584970 |

---

|    |              |              |              |
|----|--------------|--------------|--------------|
| C  | 3.389213130  | 0.132976250  | -2.689940690 |
| H  | 5.131337000  | -2.268843330 | -1.151715080 |
| H  | 2.827464090  | -3.133873470 | -2.260310910 |
| H  | 1.642293700  | -1.028539080 | -3.446677090 |
| H  | 5.317802460  | 0.382705940  | -1.572822230 |
| H  | 3.170693080  | 1.143304250  | -3.015539430 |
| Zr | 0.155983490  | 2.450917210  | 0.500237510  |
| H  | 0.717868140  | 0.334256410  | 0.572670530  |
| C  | 0.928703400  | 1.978249010  | 2.918470390  |
| C  | 0.701216530  | 3.383823300  | 2.847036550  |
| C  | -0.693699120 | 3.586585220  | 2.723791500  |
| C  | -0.313629440 | 1.325965380  | 2.784119790  |
| C  | -1.319533850 | 2.322916460  | 2.626443040  |
| H  | 1.897596760  | 1.510041710  | 3.033731720  |
| H  | 1.462108190  | 4.155277630  | 2.922923820  |
| H  | -1.196903310 | 4.544801230  | 2.673440520  |
| H  | -0.502897760 | 0.259567680  | 2.772500750  |
| H  | -2.381628400 | 2.135374580  | 2.502719150  |
| C  | -0.004823220 | 3.881346900  | -1.773759690 |
| C  | 0.693022500  | 4.667141800  | -0.826318230 |
| C  | -0.209238590 | 4.997816380  | 0.218931730  |
| C  | -1.316762010 | 3.662990760  | -1.289559010 |
| C  | -1.449694680 | 4.367470760  | -0.058474880 |
| H  | 0.410984210  | 3.474765730  | -2.685753120 |
| H  | 1.729377750  | 4.984230070  | -0.898938120 |
| H  | 0.020650270  | 5.633233070  | 1.066682210  |
| H  | -2.090148660 | 3.077962910  | -1.777234820 |
| H  | -2.355610050 | 4.429852840  | 0.535862060  |
| H  | 0.793083860  | -1.494407250 | -0.650270600 |
| H  | -1.286006800 | 1.206750360  | 0.165549290  |
| Al | -0.787973780 | -0.571485790 | -0.216872810 |
| C  | -2.029383550 | -0.964176970 | -1.755242800 |
| H  | -1.692026850 | -0.470887340 | -2.677055650 |
| H  | -1.966049960 | -2.050252010 | -1.947272890 |
| C  | -3.492018520 | -0.581717540 | -1.460717750 |
| H  | -3.604682890 | 0.506067250  | -1.329563410 |
| C  | -1.423675400 | -1.640543050 | 1.386079370  |
| H  | -0.697555010 | -1.687631430 | 2.214369020  |
| H  | -2.308298150 | -1.126586390 | 1.805380160  |
| C  | -1.825559160 | -3.081133540 | 1.008403070  |
| H  | -0.981504880 | -3.644405450 | 0.577218690  |
| H  | -2.192944640 | -3.659652000 | 1.872073360  |

|    |              |              |              |
|----|--------------|--------------|--------------|
| H  | -2.622247820 | -3.094280710 | 0.250197300  |
| H  | -3.865427380 | -1.050347090 | -0.536353310 |
| H  | -4.176714880 | -0.882023760 | -2.271443780 |
| Cl | 0.583984120  | 1.030112750  | -1.885778890 |
| Cl | 2.810437230  | 2.096560320  | 0.236026810  |

**9e**

|    |                 |                 |                 |
|----|-----------------|-----------------|-----------------|
| C  | 1.381648820000  | -2.899962100000 | 0.570998160000  |
| C  | 1.068028380000  | -2.035530300000 | 1.658575810000  |
| C  | 2.291159220000  | -1.554618830000 | 2.194710620000  |
| C  | 2.791769350000  | -2.931971520000 | 0.423728140000  |
| C  | 3.357673060000  | -2.089301300000 | 1.427075470000  |
| H  | 0.656961620000  | -3.448217950000 | -0.020966690000 |
| H  | 0.060887150000  | -1.824796550000 | 2.007148700000  |
| H  | 2.405393720000  | -0.868230870000 | 3.026992470000  |
| H  | 3.342426650000  | -3.512159750000 | -0.310005240000 |
| H  | 4.414962430000  | -1.919728920000 | 1.605544630000  |
| Zr | 2.136188100000  | -0.589917420000 | -0.153360780000 |
| C  | 3.601066560000  | -1.117101770000 | -2.151277160000 |
| C  | 2.767782540000  | -0.039760980000 | -2.571697120000 |
| C  | 3.107067390000  | 1.096580380000  | -1.804664670000 |
| C  | 4.492759880000  | -0.620264370000 | -1.161991230000 |
| C  | 4.178127990000  | 0.737987440000  | -0.929526860000 |
| H  | 3.582092780000  | -2.122708200000 | -2.557869930000 |
| H  | 1.993629140000  | -0.083956890000 | -3.333073380000 |
| H  | 2.653099230000  | 2.078007310000  | -1.885910960000 |
| H  | 5.272471210000  | -1.187234530000 | -0.662885710000 |
| H  | 4.669211030000  | 1.395956090000  | -0.220008500000 |
| Zr | -0.435929980000 | 1.829457920000  | 1.191220340000  |
| Cl | 2.205613320000  | 1.601284540000  | 1.345931560000  |
| C  | -0.162027830000 | 1.046478110000  | 3.604520540000  |
| C  | 0.190211760000  | 2.431175660000  | 3.595781750000  |
| C  | -0.976375010000 | 3.174483820000  | 3.305067320000  |
| C  | -1.542128580000 | 0.942923960000  | 3.322100270000  |
| C  | -2.044071170000 | 2.258375540000  | 3.100662050000  |
| H  | 0.507153340000  | 0.220736450000  | 3.819731890000  |
| H  | 1.177190650000  | 2.839186470000  | 3.787917590000  |
| H  | -1.042075300000 | 4.256134310000  | 3.240079700000  |
| H  | -2.110754870000 | 0.018572290000  | 3.266446320000  |
| H  | -3.073570490000 | 2.507768800000  | 2.866351960000  |
| C  | -0.431697040000 | 2.500410720000  | -1.271934760000 |
| C  | 0.344613620000  | 3.471434430000  | -0.586858230000 |

---

|    |                 |                 |                 |
|----|-----------------|-----------------|-----------------|
| C  | -0.501788640000 | 4.167011200000  | 0.314489420000  |
| C  | -1.774910810000 | 2.617065950000  | -0.812936880000 |
| C  | -1.820431830000 | 3.641253240000  | 0.166769440000  |
| H  | -0.099334190000 | 1.799345460000  | -2.032329510000 |
| H  | 1.410098830000  | 3.642003140000  | -0.698653990000 |
| H  | -0.202437530000 | 4.983605640000  | 0.964114110000  |
| H  | -2.612278510000 | 2.030575330000  | -1.174881920000 |
| H  | -2.706713600000 | 3.978423150000  | 0.694984400000  |
| H  | 0.803951950000  | -1.308699560000 | -1.366473470000 |
| H  | -1.837545470000 | 0.567770820000  | 0.736753430000  |
| Al | -3.434948290000 | -0.331341040000 | 0.680040410000  |
| H  | 0.255808370000  | 0.189214930000  | 0.156671120000  |
| C  | -3.816939520000 | -0.557726470000 | -1.261983300000 |
| H  | -2.892105430000 | -0.470674170000 | -1.852939060000 |
| H  | -4.131858860000 | -1.609060060000 | -1.380330040000 |
| Al | -0.000154510000 | -2.161372900000 | -2.775344690000 |
| C  | -4.797333700000 | 0.606577880000  | 1.805908070000  |
| H  | -4.445509370000 | 0.762415390000  | 2.837576780000  |
| H  | -5.002657920000 | 1.610175590000  | 1.391648890000  |
| C  | -1.439152980000 | -3.263341650000 | -1.947697000000 |
| H  | -1.704961330000 | -2.872753620000 | -0.953366560000 |
| H  | -2.335470740000 | -3.094687030000 | -2.569357610000 |
| C  | 1.369903340000  | -3.087792430000 | -3.901994460000 |
| H  | 1.878147850000  | -3.875701830000 | -3.317649890000 |
| H  | 2.156162230000  | -2.396074610000 | -4.242562910000 |
| Cl | -0.691367960000 | -0.325281960000 | -3.806228420000 |
| Cl | -2.725647630000 | -2.154333240000 | 1.721001280000  |
| C  | 0.703455350000  | -3.717924540000 | -5.145314320000 |
| H  | 1.430319870000  | -4.243032840000 | -5.786052310000 |
| H  | -0.071572280000 | -4.449986830000 | -4.872696460000 |
| H  | 0.216372800000  | -2.952353480000 | -5.767601920000 |
| C  | -1.164075520000 | -4.777244280000 | -1.858865740000 |
| H  | -2.001596220000 | -5.317710730000 | -1.389311800000 |
| H  | -1.004148700000 | -5.226453780000 | -2.850198150000 |
| H  | -0.266796020000 | -5.013839370000 | -1.264175910000 |
| C  | -4.903111010000 | 0.363970510000  | -1.850247890000 |
| H  | -5.065967340000 | 0.170795570000  | -2.922600220000 |
| H  | -5.872786200000 | 0.232165850000  | -1.347487560000 |
| H  | -4.650675940000 | 1.432838330000  | -1.759041500000 |
| C  | -6.108778410000 | -0.208397860000 | 1.854344460000  |
| H  | -6.531473730000 | -0.371337790000 | 0.851438220000  |
| H  | -5.944108700000 | -1.201710190000 | 2.297858090000  |

---

|   |                 |                |                |
|---|-----------------|----------------|----------------|
| H | -6.887151400000 | 0.290601530000 | 2.454109550000 |
|---|-----------------|----------------|----------------|
